# Supplementary material for: The Natural Product Domain Seeker version 2 (NaPDoS2) webtool relates ketosynthase phylogeny to biosynthetic function
Source: PubMed Central journal article supplement (PMC9582728; doi:10.1016/j.jbc.2022.102480), 2022-09-12
Supplement: mmc1.pdf [file mmc1.pdf]

## **Supporting Information for:**

### **The Natural Product Domain Seeker version 2 (NaPDoS2) webtool relates ketosynthase phylogeny to biosynthetic function**

Leesa J Klau<sup>1,2,§</sup>, Sheila Podell<sup>1,§</sup>, Kaitlin E Creamer<sup>1,§</sup>, Alyssa M Demko<sup>1,5</sup>, Hans W Singh<sup>1</sup>, Eric E Allen<sup>1,3</sup>, Bradley S Moore<sup>1,4</sup>, Nadine Ziemert<sup>1,6</sup>, Anne Catrin Letzel<sup>1</sup>, Paul R Jensen<sup>1,\*</sup>

<sup>1</sup> Center for Marine Biotechnology and Biomedicine, Scripps Institution of Oceanography, University of California San Diego, La Jolla, CA 92037, United States

<sup>2</sup> Department of Biotechnology and Food Science, Norwegian University of Science and Technology (NTNU), Trondheim, Norway

<sup>3</sup> Marine Biology Research Division, Scripps Institution of Oceanography, University of California San Diego, La Jolla, CA 92037, United States

<sup>4</sup> Skaggs School of Pharmacy and Pharmaceutical Sciences, University of California San Diego, La Jolla, CA 92037, United States

\* Email: [pjensen@ucsd.edu](mailto:pjensen@ucsd.edu)

§ L.J.K., S.P., and K.E.C. contributed equally to this paper.

Present addresses:

<sup>5</sup> A.M.D.: Smithsonian Marine Station, Fort Pierce, FL 34949, United States

<sup>6</sup> N.Z.: Interfaculty Institute of Microbiology and Infection Medicine, Institute for Bioinformatics and Medical Informatics (IBMI), University of Tübingen, Auf der Morgenstelle 28, 72076 Tübingen, Germany. German Centre for Infection Research (DZIF), Partner Site Tübingen, Germany

## **Supporting Information Table of Contents:**

|                                                                                                  |         |
|--------------------------------------------------------------------------------------------------|---------|
| <b>Figure S1.</b> NaPDoS2 bioinformatic pipeline.....                                            | pg.S-3  |
| <b>Figure S2.</b> Featured webtool updates.....                                                  | pg.S-4  |
| <b>Figure S3.</b> NaPDoS2 workflow and analysis roadmap.....                                     | pg.S-6  |
| <b>Figure S4.</b> Comparison of the expanded NaPDoS2 database.....                               | pg.S-8  |
| <b>Figure S5.</b> NaPDoS2 classification overview.....                                           | pg.S-9  |
| <b>Figure S6.</b> Verification of NaPDoS2 KS domain classifications.....                         | pg.S-12 |
| <b>Figure S7.</b> Maximum likelihood KS phylogeny.....                                           | pg.S-14 |
| <b>Figure S8.</b> Maximum likelihood type II KS phylogeny.....                                   | pg.S-16 |
| <b>Figure S9.</b> Maximum likelihood type II aromatic KS $\alpha$ and KS $\beta$ phylogeny ..... | pg.S-18 |
| <b>Figure S10.</b> Negative control KS sequence selection.....                                   | pg.S-20 |
| <b>Figure S11.</b> Effect of query size on KS detection and accuracy.....                        | pg.S-22 |

|                                                                                                 |                |
|-------------------------------------------------------------------------------------------------|----------------|
| <b>Figure S12.</b> KS domain sequence diversity.....                                            | pg.S-24        |
| <b>Figure S13.</b> Amplicon detection accuracy.....                                             | pg.S-26        |
| <br>                                                                                            |                |
| <b>Table S1.</b> Processing times for NaPDoS release (V1) versus NaPDoS2 (V2).....              | pg.S-28        |
| <b>Table S2.</b> NaPDoS2 database summary.....                                                  | pg.S-29        |
| <b>Table S3.</b> Accession numbers and dataset references (Excel file).....                     | pg.S-31        |
| <b>Table S4.</b> <i>Salinispora</i> spp. type II KS domains.....                                | pg.S-32        |
| <b>Table S5.</b> Complete list of <i>Salinispora</i> spp. KS domains identified by NaPDoS2..... | pg.S-34        |
| <b>Table S6.</b> KS domains identified in 27 fungal genomes by NaPDoS2.....                     | pg.S-37        |
| <b>Table S7.</b> KS detection using NaPDoS versions 1 and 2.....                                | pg.S-39        |
| <b>Table S8.</b> NaPDoS2 analysis of the <i>Elysia chlorotica</i> genome.....                   | pg.S-41        |
| <b>Table S9.</b> Moorea sediment metagenomes analyzed with NaPDoS2.....                         | pg.S-43        |
| <b>Table S10.</b> NaPDoS2 analysis of an eSNaPD v2.0 dataset. ....                              | pg.S-45        |
| <b>Table S11.</b> NaPDoS2 analysis of amplicon datasets from Borsetto <i>et al.</i> 2019....    | pg.S-47        |
| <b>Table S12.</b> NaPDoS2 analysis of amplicon sequences from Elfeki <i>et al.</i> 2018....     | pg.S-49        |
| <br>                                                                                            |                |
| <b>References</b> .....                                                                         | <b>pg.S-51</b> |

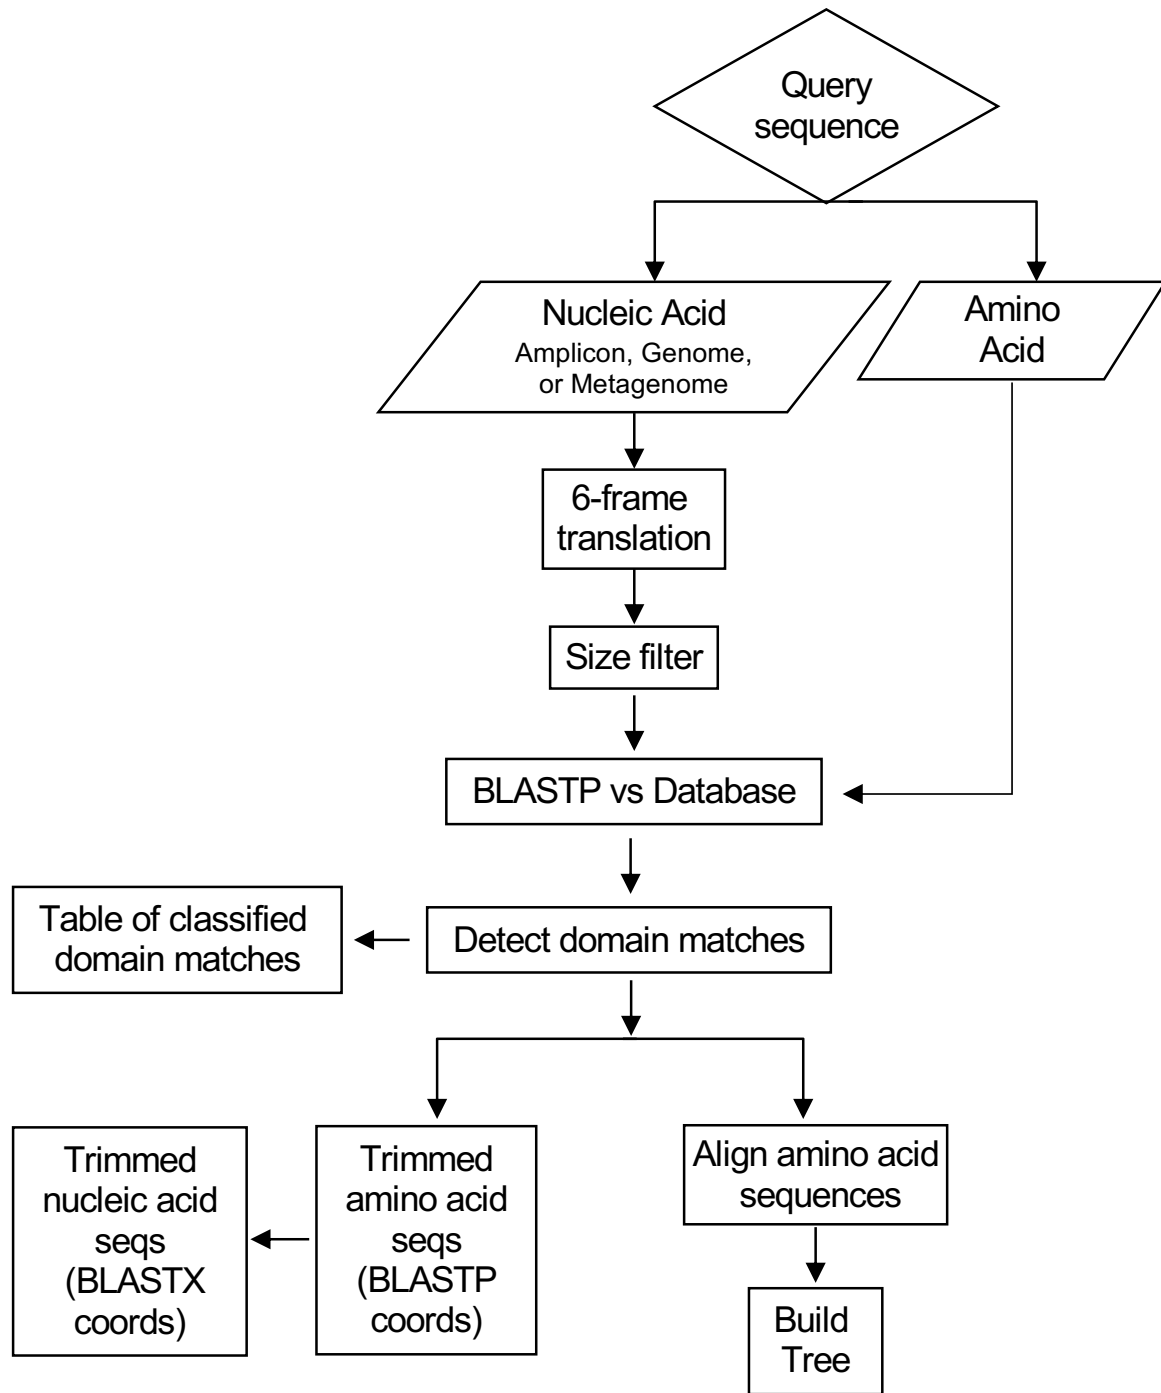

**Figure S1. NaPDoS2 bioinformatic pipeline.** Translated nucleotide and protein query sequences are compared to an internal database of KS and C domains using BLASTP. Detailed descriptions of individual steps can be found in the GitHub repository site: [https://github.com/spodell/NaPDoS2\\_website](https://github.com/spodell/NaPDoS2_website).

Figure S2.

A.

# NaPDoS 2

Natural Product Domain Seeker

Home
QuickStart
Run Analysis
Classification
BGCs
Contact Us

---

### Domain Classification Summary

- 301 KS domains were identified from 58584 input sequences.
- Click on buttons below to view a detailed table of results, download domain sequences in fasta format, or build comparative trees.

[VIEW ALL MATCHES](#)

---

### Individual Domain Classes

- Select one or more categories below to view a subset of matches.

[Select All](#)

| Select                   | Class                   | Subclass                   | Num matches |
|--------------------------|-------------------------|----------------------------|-------------|
| <input type="checkbox"/> | type I modular cis-AT   | no subclass                | 105         |
| <input type="checkbox"/> | type II polyene         | KSa                        | 36          |
| <input type="checkbox"/> | type II FAS             | no subclass                | 29          |
| <input type="checkbox"/> | type I modular cis-AT   | hybrid KS                  | 29          |
| <input type="checkbox"/> | type II polyene         | KSb                        | 24          |
| <input type="checkbox"/> | type I iterative cis-AT | enediynes                  | 18          |
| <input type="checkbox"/> | type II aromatic        | pentangular polyphenol KSa | 12          |
| <input type="checkbox"/> | type I modular cis-AT   | loading module             | 12          |
| <input type="checkbox"/> | type II aromatic        | pentangular polyphenol KSb | 12          |
| <input type="checkbox"/> | type II aromatic        | angucycline II KSb         | 12          |
| <input type="checkbox"/> | type II aromatic        | angucycline II KSa         | 12          |

Right-click to [DOWNLOAD](#) this table in tab-delimited format.

[VIEW A SUBSET](#)

B.

# NaPDoS 2

Natural Product Domain Seeker

Home
QuickStart
Run Analysis
Classification
BGCs
Contact Us

---

### Database Search Results

Results below are for 18 KS domain sequences, from 1 different categories.

Use check boxes to select candidates for [further analysis](#) below. (options may take a few seconds to load for large match tables).

Click on column headers to sort (multiple clicks toggle between ascending and descending order).

[Select All](#)

|                          | cand_id                          | database match               | percent identity | align length | e-value  | BGC product match | domain class            | domain subclass |
|--------------------------|----------------------------------|------------------------------|------------------|--------------|----------|-------------------|-------------------------|-----------------|
| <input type="checkbox"/> | SICNB476_B<br>AI2518148436_3_459 | sporolide_KS01_IPKSenediynes | 100              | 457          | 4.6e-270 | sporolide         | type I iterative cis-AT | enediynes       |
| <input type="checkbox"/> | SICNR699_B<br>AI2519083725_3_459 | sporolide_KS01_IPKSenediynes | 100              | 457          | 6.0e-270 | sporolide         | type I iterative cis-AT | enediynes       |
| <input type="checkbox"/> | SICNY681_Y<br>UI2562100025_8_462 | dynemicin_KS01_IPKSenediynes | 65               | 455          | 4.5e-164 | dynemicin         | type I iterative cis-AT | enediynes       |
| <input type="checkbox"/> | SICNY678_Y<br>UI2562105300_8_462 | dynemicin_KS01_IPKSenediynes | 65               | 455          | 4.5e-164 | dynemicin         | type I iterative cis-AT | enediynes       |
| <input type="checkbox"/> | SICNT250_BA<br>I2540889083_8_462 | dynemicin_KS01_IPKSenediynes | 65               | 455          | 4.5e-164 | dynemicin         | type I iterative cis-AT | enediynes       |
| <input type="checkbox"/> | SICNS197_B<br>AI2515885312_8_462 | dynemicin_KS01_IPKSenediynes | 65               | 455          | 4.5e-164 | dynemicin         | type I iterative cis-AT | enediynes       |
| <input type="checkbox"/> | SICNR699_B<br>AI2519086844_8_462 | dynemicin_KS01_IPKSenediynes | 65               | 455          | 4.5e-164 | dynemicin         | type I iterative cis-AT | enediynes       |
| <input type="checkbox"/> | SICNB440_B<br>AI640472868_8_462  | dynemicin_KS01_IPKSenediynes | 65               | 455          | 4.5e-164 | dynemicin         | type I iterative cis-AT | enediynes       |

Right-click to [DOWNLOAD](#) this table in tab-delimited format.

### Options

- Output selected sequences in fasta format
- Output Alignment with closest database matches  
Select alignment format:
- Construct tree (candidate domains + blast matches + reference domains)

[GET RESULTS](#)

C.

# NaPDoS 2

Natural Product Domain Seeker

Home
QuickStart
Run Analysis
Classification
BGCs
Contact Us

---

### aclacinomycin

**BGC type:** pks

**Example product:** aclacinomycin A

**Source species:** *Streptomyces galliaeus*

**PubMed ref id or DOI:** [12137949](#)

**MIBiG id:** [BGC0000192](#)

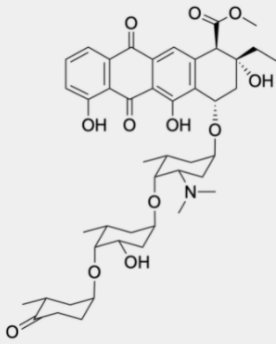

---

### Domain Classifications

KS and/or C domains for this BGC identified in the current NaPDoS database are listed below. Click on the class name link for a more detailed description.

| Database ID                                           | Domain type | Class                            | Subclass             |
|-------------------------------------------------------|-------------|----------------------------------|----------------------|
| <a href="#">aclacinomycin_KS01_anthracyclineIIKSa</a> | KS          | <a href="#">type II aromatic</a> | anthracycline II KSa |
| <a href="#">aclacinomycin_KS02_anthracyclineIIKSb</a> | KS          | <a href="#">type II aromatic</a> | anthracycline II KSb |

**Figure S2. Featured webtool updates.** A). Domain classification summary page. In this example, 301 KS domains were detected in twelve bacterial genomes (58,584 protein sequences). The number of domains detected in each class and subclass is indicated. B). Database search results page. Expanded view of the 18 type I iterative *cis*-AT enediyne domains from the search shown in (A). C). BGC page. Clicking on the BGC product match hyperlink from the Database Search Results in panel (B) provides the compound structure and details about the associated BGC and all corresponding KS classifications (C domains to be updated in a later release).

Figure S3.

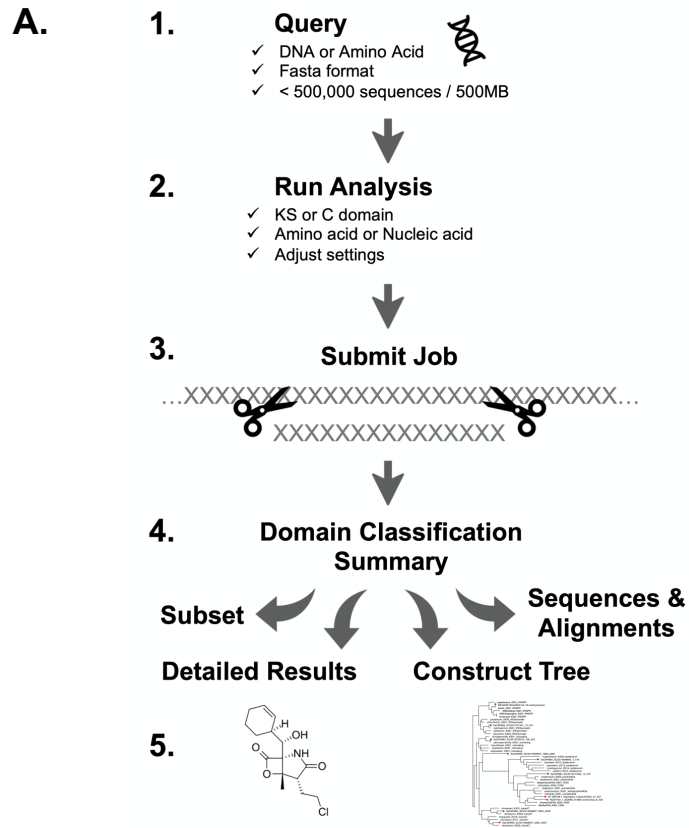

**B.**

**Genomes**

- Bacteria
- Fungi
- Animals
- Plants
- BGCs (Biosynthetic Gene Clusters)

**Metagenomes**

- Shotgun metagenomes
- MAGs (Metagenome Assembled Genomes)

**KS/C Amplicon sequences**

- NGS (Next-generation sequencing)
- Clones

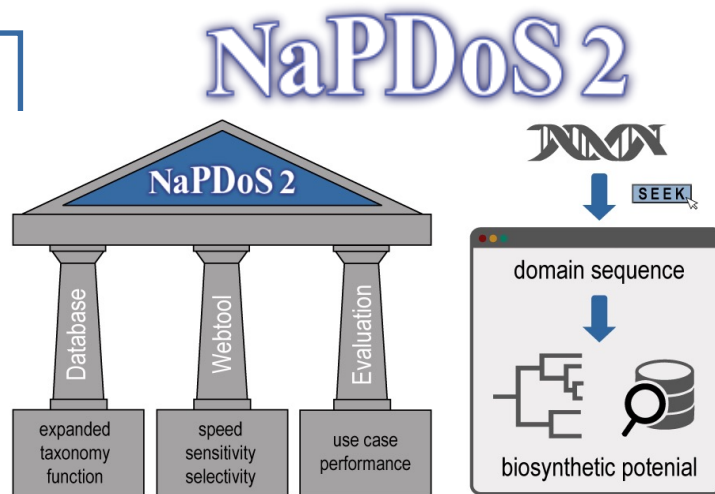

Novelty  
Phylogeny  
Classification  
Genomic Context  
Functional insight  
Structural features

**Figure S3. NaPDoS2 workflow and analysis roadmap.** A) The NaPDoS2 user workflow consists of submitting a query sequence, selecting the type of analysis to run, submitting the job, and deciding what output to view or analyses to complete. B) A roadmap for the use of NaPDoS2 starts with genomic, metagenomic, or KS/C domain amplicon sequences derived from a variety of sources. The expanded database and webtool improvements provide important analytical upgrades while extensive use testing demonstrates the applications of NaPDoS2 to assess biosynthetic potential by detecting and classifying KS and C domain sequences. NaPDoS2 output can be further analyzed using a variety of tools to assess novelty, phylogeny, classification, genomic context, function, and small molecule structural features. Detailed, step-by-step tutorial examples can be found in the downloadable “Documentation” PDF linked on the NaPDoS2 webpage.

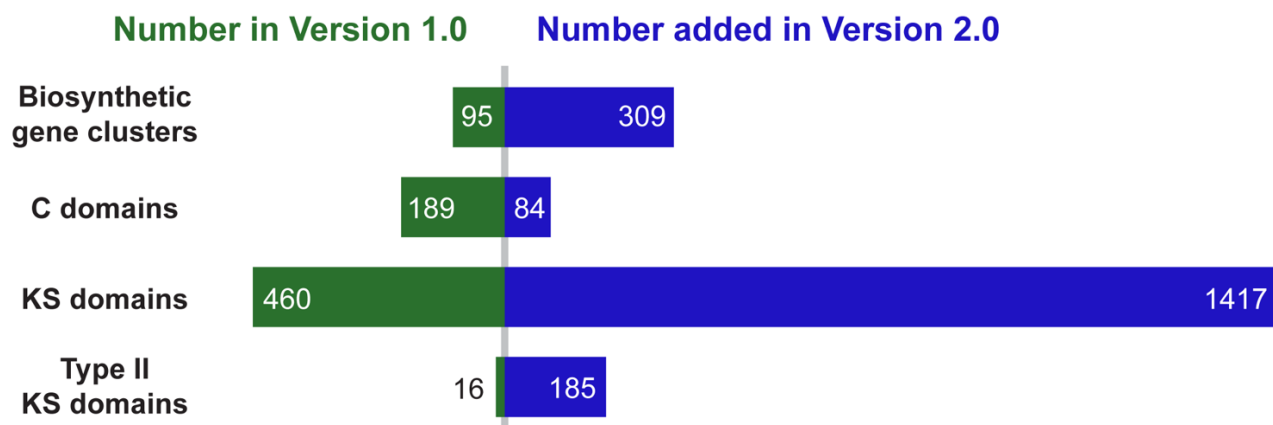

**Figure S4. Comparison of the expanded NaPDoS2 database with the original NaPDoS version 1 release<sup>1</sup>.** The NaPDoS2 reference database contains 273 C domains and 1,877 KS domains from a total of 404 BGCs.



Figure S5.

# NaPDoS 2

Natural Product Domain Seeker

Home
QuickStart
Run Analysis
Classification
BGCs
Contact Us

---

## Classification Overview

The NaPDoS2 classification scheme is summarized below. For more detailed descriptions of the KS and C domain categories and relevant literature see the downloadable [DOCUMENTATION](#) file.

Database sequences have been given class and subclass designations based on their phylogenetic clade topology and established functions in their respective PKS or NRPS genes. Note that individual domains in the same gene may be classified differently. These classifications can provide insight into:

- product structural features (e.g., PUFAs, enediynes, aromatic polyketides)
- gene architecture (e.g., cis- or trans-AT)
- taxonomic groups in which the sequence resides (e.g., bacteria, fungi, protist, metazoa).

Query sequences are assigned classifications according to their top NaPDoS2 BLAST match, providing insight into the biosynthetic potential of the sample. The abbreviations used in the database, reference tree, and NaPDoS2 output are given in parentheses below.

### KS Domains

---

Delineated into three primary groups: FAS, type I PKS, and type II PKS.

#### 1. Fatty Acid Synthase (FAS)

**Class: Type I FAS**  
Large multifunctional proteins responsible for fatty acid biosynthesis.

- **Subclass: Bacteria and fungi (bfFASI)**  
Observed in bacteria and fungi.
- **Subclass: Metazoa (MetazoaFASI)**  
Observed in the phyla Chordata and Nematoda
- **Subclass: Protist (ProtistFASI)**  
Observed in the phylum Apicomplexa (Alveolata)

**Class: Type II FAS (FASII)**  
Discrete, monofunctional proteins responsible for fatty acid biosynthesis.

#### 2. Type I

Canonical type I PKSs containing KS, AT, and ACP domains and functioning in an assembly-line fashion.

**Class: Modular cis-AT (cisAT)**  
Canonical type I PKSs containing KS, AT, and ACP domains and functioning in an assembly-line fashion.

- **Subclass: Olefin synthase (cisOLS)**  
Associated with the biosynthesis of a terminal olefin.
- **Subclass: Loading module (cisloading)**  
KS in the first module of cis-AT modular PKS in which the catalytic cysteine has been replaced with glutamine (sometimes called KSQ).
- **Subclass: Hybrid (cisHybridKS)**  
Downstream of a peptidyl carrier protein (PCP) domain. Catalyzes the condensation of an acyl group on a PCP-tethered intermediate.
- **Subclass: Tandem ECH (cistandemECH)**  
Found in modules immediately downstream of beta-branching cassettes (gene cassettes involved in the introduction of a beta-branch). Contain a cis-acting ECH domain that performs the final decarboxylation to produce an unsaturated beta-branch.

**Class: Iterative cis-AT (iPKS)**  
Cis-AT type I PKSs that function iteratively, observed in bacteria and fungi.

- **Subclass: Polyunsaturated fatty acid (iPKSPUFA)**  
Produce long chain fatty acids that contain multiple cis double bonds.
- **Subclass: Enediyne (iPKSenediyne)**  
Produce nine- or ten-membered rings that contain a conjugated alkyne-alkene-alkyne moiety.
- **Subclass: Aromatic (iPKSaromatic)**  
Produce simple aromatic compounds that usually consist of mono- or bicyclic rings.
- **Subclass: Polycyclic tetramate macrolactam-like (iPKSPTM)**  
Produce compounds usually consisting of a tetramic acid moiety and 2-3 rings fused to a macrolactam.
- **Subclass: Non-reducing (iPKSNR)**  
Associated with PKSs that lack all KR, DH, and ER domains. Produce mono- or polycyclic aromatic polyketides from poly-beta-keto chains. Observed in fungi.
- **Subclass: Partially reducing (iPKSPR)**  
Associated with PKSs that lack some KR, DH, and ER domains. Produce simple mono- or bicyclic aromatic compounds similar to the products of bacterial aromatic iPKSs. Observed in fungi.
- **Subclass: Highly reducing (iPKSHR)**  
Associated with PKSs that possess all KR, DH, and ER domains. Produce linear and cyclic non-aromatic compounds. Observed in fungi.

**Class: trans-AT (transAT)**  
Modular, assembly line PKS in which the AT domain(s) are freestanding as opposed to occurring in the module.

- **Subclass: B domain (transBdomain)**  
KS domains that occur together with a branching (B) domain and facilitate the formation of a beta branch.
- **Subclass: Hybrid (transHybridKS)**  
Similar to cisHybridKSs (see above) except the AT domain occurs in trans.
- **Subclass: Hybrid non-elongating KS (transHybridKS0)**  
Non-elongating KS domains (KS0) in trans-AT modules that follow an NRPS module.

**Class: Metazoa (MetazoaPKS)**  
Type I KS domains detected in metazoa.

**Class: Protist (ProtistPKS)**  
Type I KS domains detected in protists.

### 3. Type II

Discrete, monofunctional proteins.

**Class: Aromatic (aromaticKsA or aromaticKSb)**

Heterodimers that consist of alpha and beta subunits and produce polycyclic aromatic compounds through the iterative decarboxylative condensation of malonyl-CoA extender units onto an acyl starting unit.

- **Subclass: angucycline-derived I (angucyclinelKsA or angucyclinelKSb)**  
Compounds contain or were derived from an angular tetracyclic structure comprising a benzanthracene moiety. Most frequently initiated with acetyl-CoA starting unit.
- **Subclass: angucycline-derived II (angucyclinelKsA or angucyclinelKSb)**  
Distinguished from angucycline-derived I by initiation with a methylmalonyl-CoA starting unit.
- **Subclass: anthracycline-derived I (anthracyclinelKsA or anthracyclinelKSb)**  
Compounds possess a linear tetracyclic core derived from 7,8,9,10-tetrahydro-5,12-naphtaquinones. Initiated with acetyl-CoA starting unit.
- **Subclass: anthracycline-derived II (anthracyclinelKsA or anthracyclinelKSb)**  
Distinguished from anthracycline-derived I by initiation with methylmalonyl-CoA starting unit.
- **Subclass: isochromanequinone-derived (isochromanequinoneKsA or isochromanequinoneKSb).**  
Compounds with a linear tricyclic core structure containing isochromane and quinone moieties often forming dimers.
- **Subclass: pentangular polyphenol-derived (pentangularpolyphenolKsA or pentangularpolyphenolKSb)**  
Produce long-chain polyphenols that form angular polycyclic core structures.
- **Subclass: tetracenomycin-derived (tetracenomycinKsA or tetracenomycinKSb)**  
Produce linear tetracyclic decaketide core structures resulting from nine elongations of an acetyl-CoA starting unit.
- **Subclass: tetracycline-derived (tetracyclineKsA) or (tetracyclineKSb)**  
Produce compounds with a tetracyclic ring structure characterized by a carboxamido moiety resulting from a malonamyl-CoA starting unit.
- **Subclass: spore pigment (sporepigmentKsA or sporepigmentKSb)**  
Associated with the biosynthesis of streptomycete spore pigments (e.g. whiE in *S. coelicolor*) although compounds are not well characterized.

**Class: Beta-branching cassettes (betabranh)**

KS domains associated with HMGS cassettes that introduce a beta-branch to a beta-keto group. These stand alone KSs lack the active site cysteine required for condensation and function to decarboxylate ACP-bound malonyl as an early step in beta branch formation

**Class: Polyenes (polyeneKsA or polyeneKSb)**

Iteratively acting KSs that produce reduced, linear polyenes rather than polycyclic aromatic compounds.

**Class: Aryl polyenes (arylpolyeneKsA or arylpolyeneKSb)**

Iteratively acting PKSs that produce polyene chains with an aryl moiety that is often substituted.

**Class: Non-iterative (noniterative)**

Discrete monofunctional proteins that function as an assembly line to produce compounds such as pamamycin and nonactin.

## C Domains

**Class: Starter (starter)**

Typically, the first module of a NRPS usually does not contain a C domain. But, when present, these starter C domains acylate the first amino acid with a fatty acid, polyketide, or other molecule.

**Class: LCL (LCL)**

Catalyzes the formation of a peptide bond between two L-amino acids.

**Class: DCL (DCL)**

Catalyzes the formation of a peptide bond between an L-amino acid and a growing peptide ending with a D-amino acid.

**Class: Cyclization (cyclization)**

Catalyzes both peptide bond formation and the subsequent cyclization of cysteine, serine or threonine residues.

**Class: Epimerization (epimerization)**

Changes the chirality of the last amino acid in the chain from L to D.

**Class: Dual (dual)**

Catalyzes both condensation and epimerization reactions.

**Class: Modified amino acid (modifiedAA)**

Modifies the incorporated amino acid: for example the dehydration of serine to dehydroalanine.

**Class: Hybrid (hybridC)**

Occur in PKS-NRPS BGCs. The condensation domain that occurs immediately downstream of a PKS module; condenses an amino acid to a growing polyketide.

**Class: Condensation (condensation)**

Condensation domains with no known specialized functionality.

**Figure S5. NaPDoS2 classification overview.** Class and subclass descriptions as described on the NaPDoS2 website. Additional details and relevant references can be found in the downloadable “Documentation” PDF linked at the top of the webpage.

**Figure S6.**

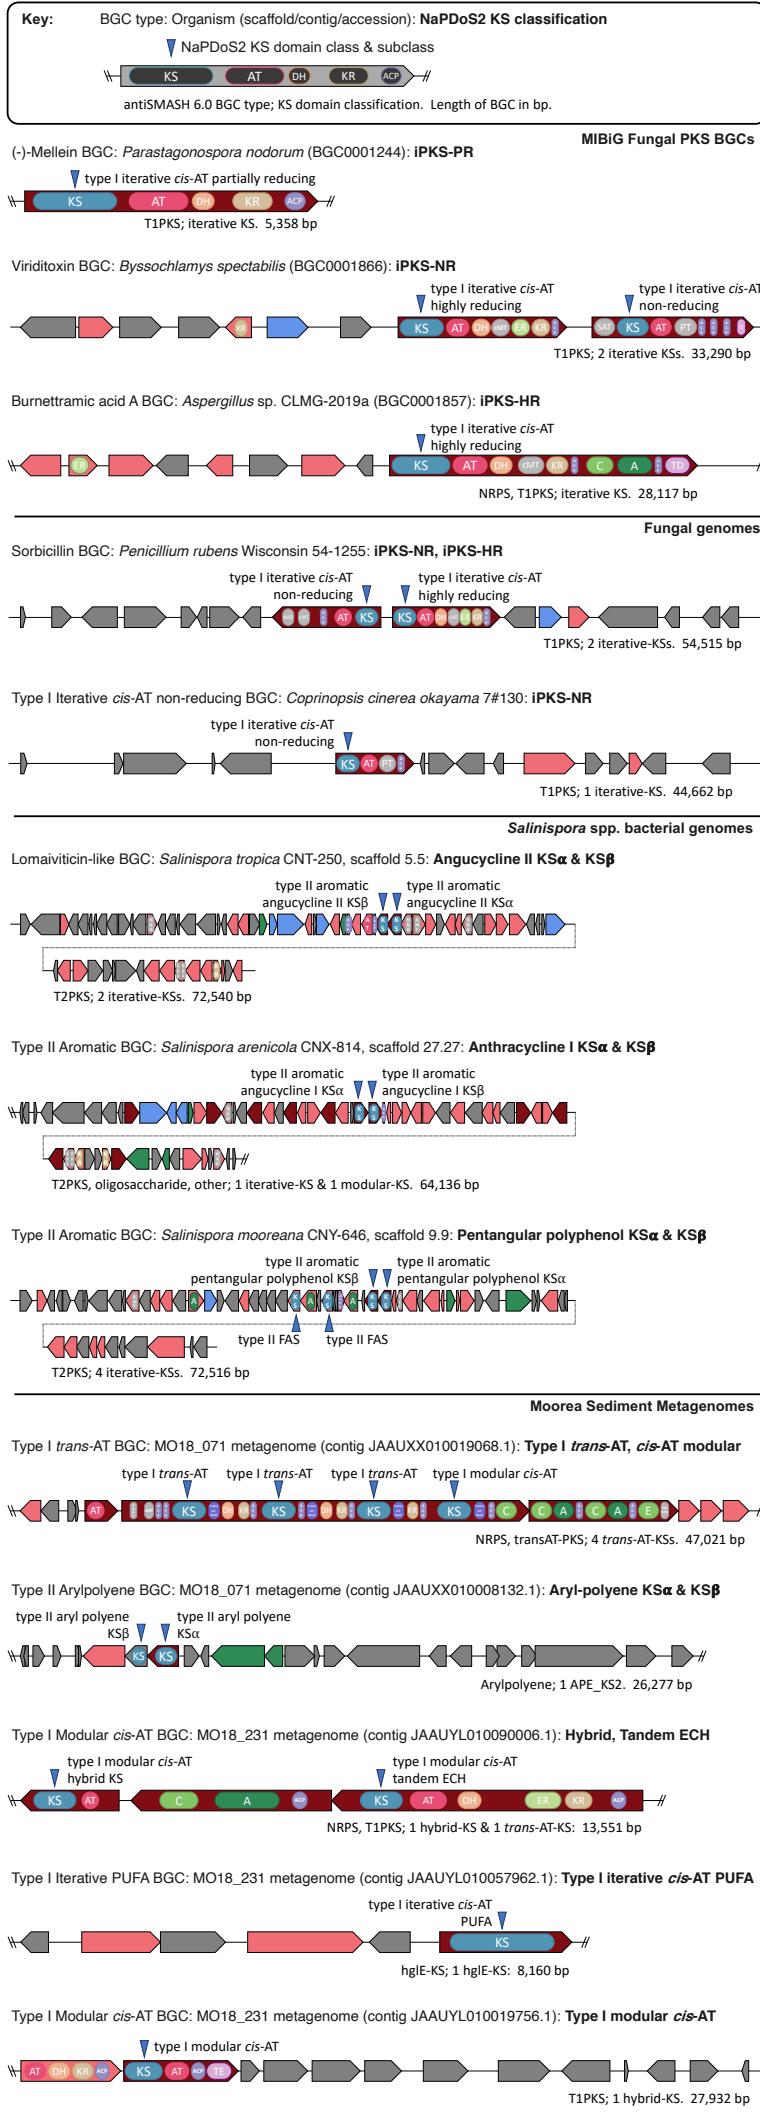

**Figure S6. Verification of NaPDoS2 KS domain classifications.** Biosynthetic gene cluster context of select KSs detected in the application use case analyses. For each KS, the associated scaffold or contig was extracted and run through antiSMASH 6.0<sup>2</sup> (<https://antismash.secondarymetabolites.org/>), transATor<sup>3</sup> (<https://transator.ethz.ch/>), and the “PKS/NRPS Analysis Web-site”<sup>4</sup> (<http://nrps.igs.umaryland.edu/>). The BGCs were drawn and colored as determined by antiSMASH 6.0 (maroon, core biosynthetic gene; pink, additional biosynthetic gene; blue, transport-related genes; green, regulatory genes, grey, other genes). Domain position and function were drawn and colored according to antiSMASH 6.0<sup>2</sup>, transATor<sup>3</sup>, and “PKS/NRPS Analysis Web-site”<sup>4</sup> (blue, KS ketosynthase; pink, AT acyl transferase; sand, KR ketoreductase; pale purple ACP Phosphopantetheine acyl carrier protein, ACPS holo-ACP synthase; orange, DH dehydratase; light grey, cMT carbon methyltransferase, FkbH domain, NAD Male sterility protein, AmT aminotransferase, Cyc cyclase, GNAT GNAT domain, TIGR01720 NRPS domain of unknown function; light pink, TE thioesterase, TD Terminal reductase domain; pale green ER enoyl reductase; dark blue, *trans*-AT docking *trans*-acyltransferase docking domain; light green, C condensation domain of NRPS, E epimerization domain; dark green, A adenylation domain). Blue arrows point to KS hits that NaPDoS2 detected and classified in the BGC context; arrows are labeled with the NaPDoS2 KS domain classification. The antiSMASH 6.0<sup>2</sup> BGC type and KS domain classification, followed by the length of the entire BGC (in base pairs) is listed below each BGC, as indicated in the key.

We strategically chose diverse use case analyses for ground-truthing the contextual genomic evidence for KS domain-based classification. NaPDoS2 correctly classified KSs associated with partially reducing ((-)-Mellein), non-reducing (viriditoxin), and highly reducing (burnettramycin A) fungal BGCs from MIBiG 2.0<sup>5</sup>, as confirmed by literature reports and antiSMASH 6.0<sup>2</sup> output. Next, NaPDoS2 correctly classified the KSs in the sorbicillin BGC from *Penicillium rubens* fungal genome, which contains both non-reducing and highly reducing KS domains. NaPDoS2 also identified a type I iterative *cis*-AT non-reducing KS in an orphan BGC in the *Coprinopsis cinerea okayama* basidiomycete genome. Next, NaPDoS2 also correctly identified the KS domains in the lomaiviticin BGC as type II aromatic angucycline II, and detected the KSs associated with two *Salinispora* orphan BGCs as type II aromatic anthracycline I and pentangular polyphenol. Finally, NaPDoS2 correctly classified *trans*-AT, *cis*-AT, aryl-polyene, hybrid, tandem ECH, modular, and PUFA KS domains from metagenomic assemblies based on their respective BGC context. In many cases, the NaPDoS2 classification was more specific than antiSMASH 6.0<sup>2</sup> BGC domain predictions.

Figure S7.

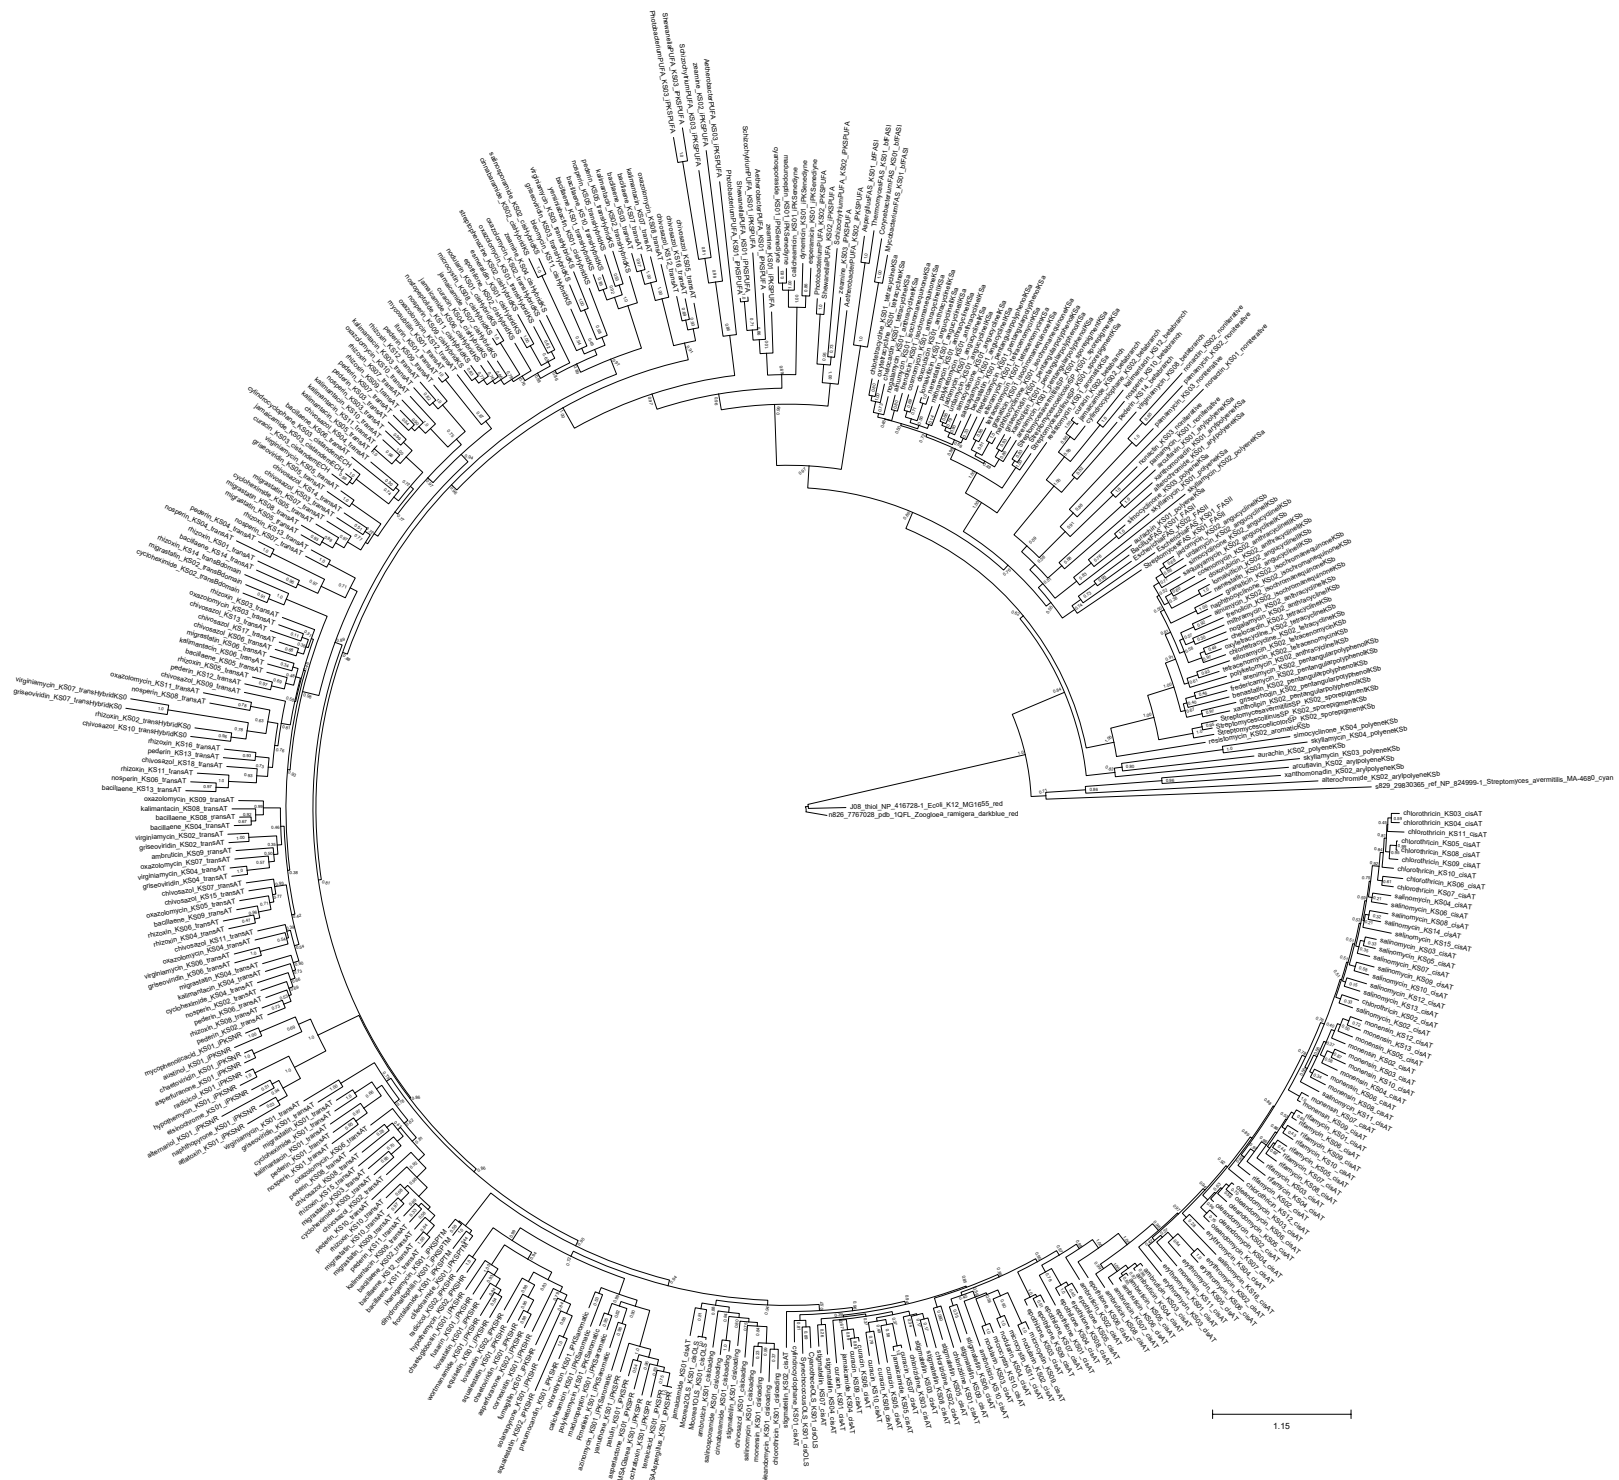

**Figure S7. Maximum likelihood KS phylogeny.** Tree includes 414 KS sequences and 3 thiolase sequences as outgroups. The full name of each sequence is listed on the branch tips, which can help link a query match to a specific location in the tree. Bootstrap support is listed for each node. Thiolases from *Escherichia coli* (NP\_416728.1) and *Zoogloea ramigera* (1QFL\_A) and a SCP-x thiolase from *Streptomyces avermitilis* (NP\_824999.1) were used as outgroups.

Figure S8.

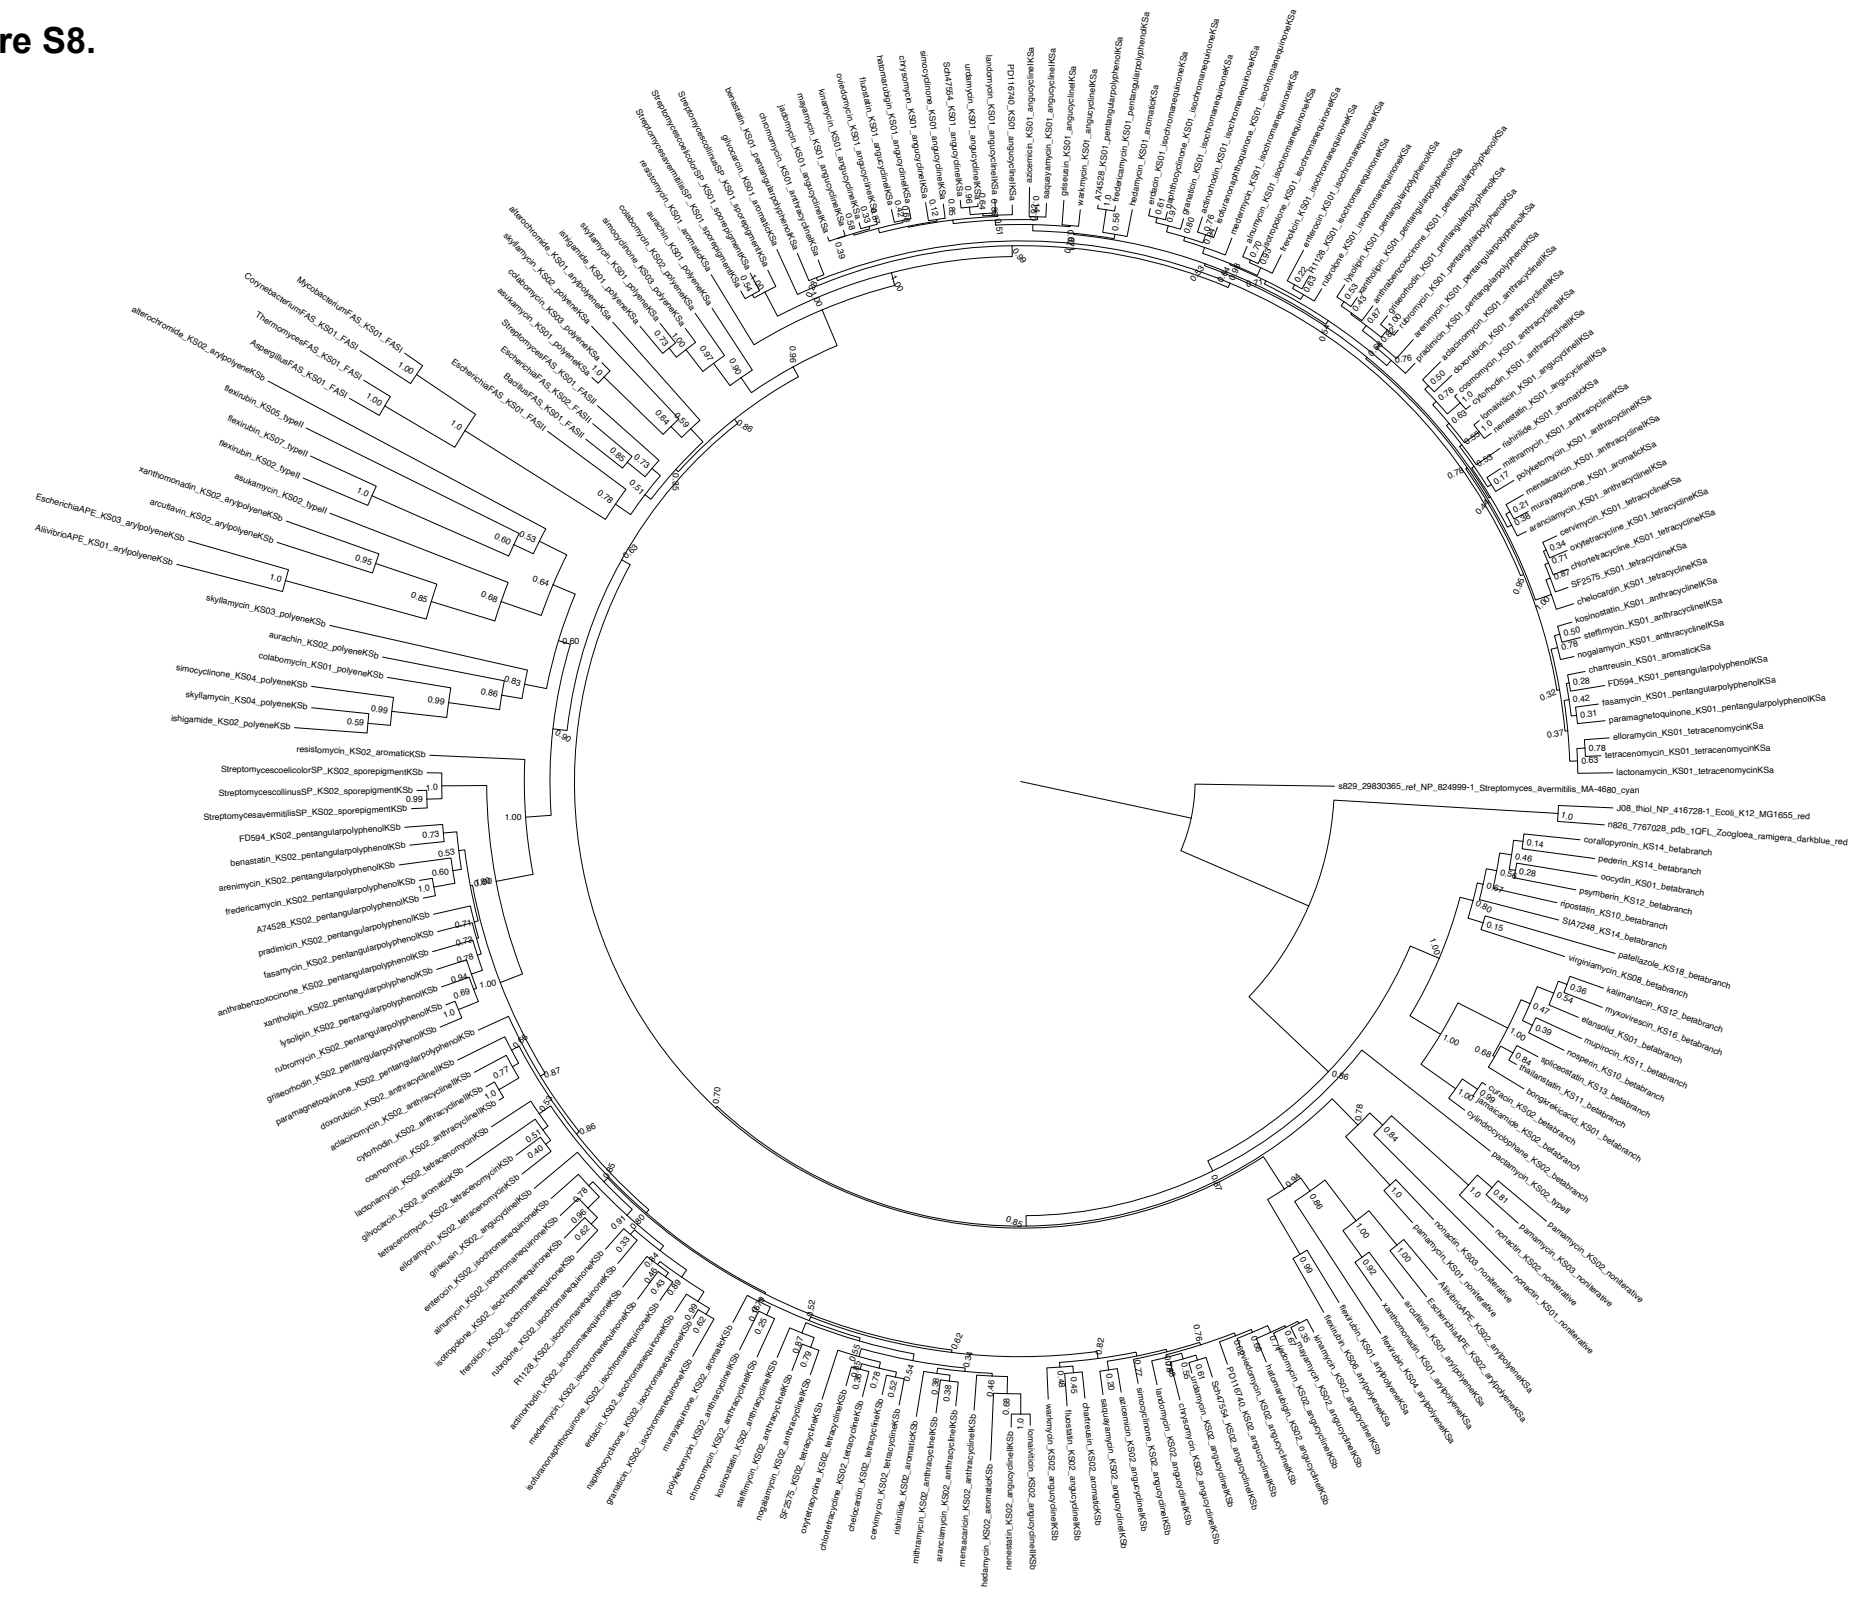



**Figure S8. Maximum likelihood type II KS phylogeny.** Tree includes 201 type II KS sequences, 8 FAS sequences and 3 thiolase sequences as outgroups. The full name of each sequence is listed on the branch tips, which can help link a query match to a specific location in the tree. Bootstrap support is listed for each node. Thiolases from *Escherichia coli* (NP\_416728.1) and *Zoogloea ramigera* (1QFL\_A) and a SCP-x thiolase from *Streptomyces avermitilis* (NP\_824999.1) were used as outgroups.

Figure S9.

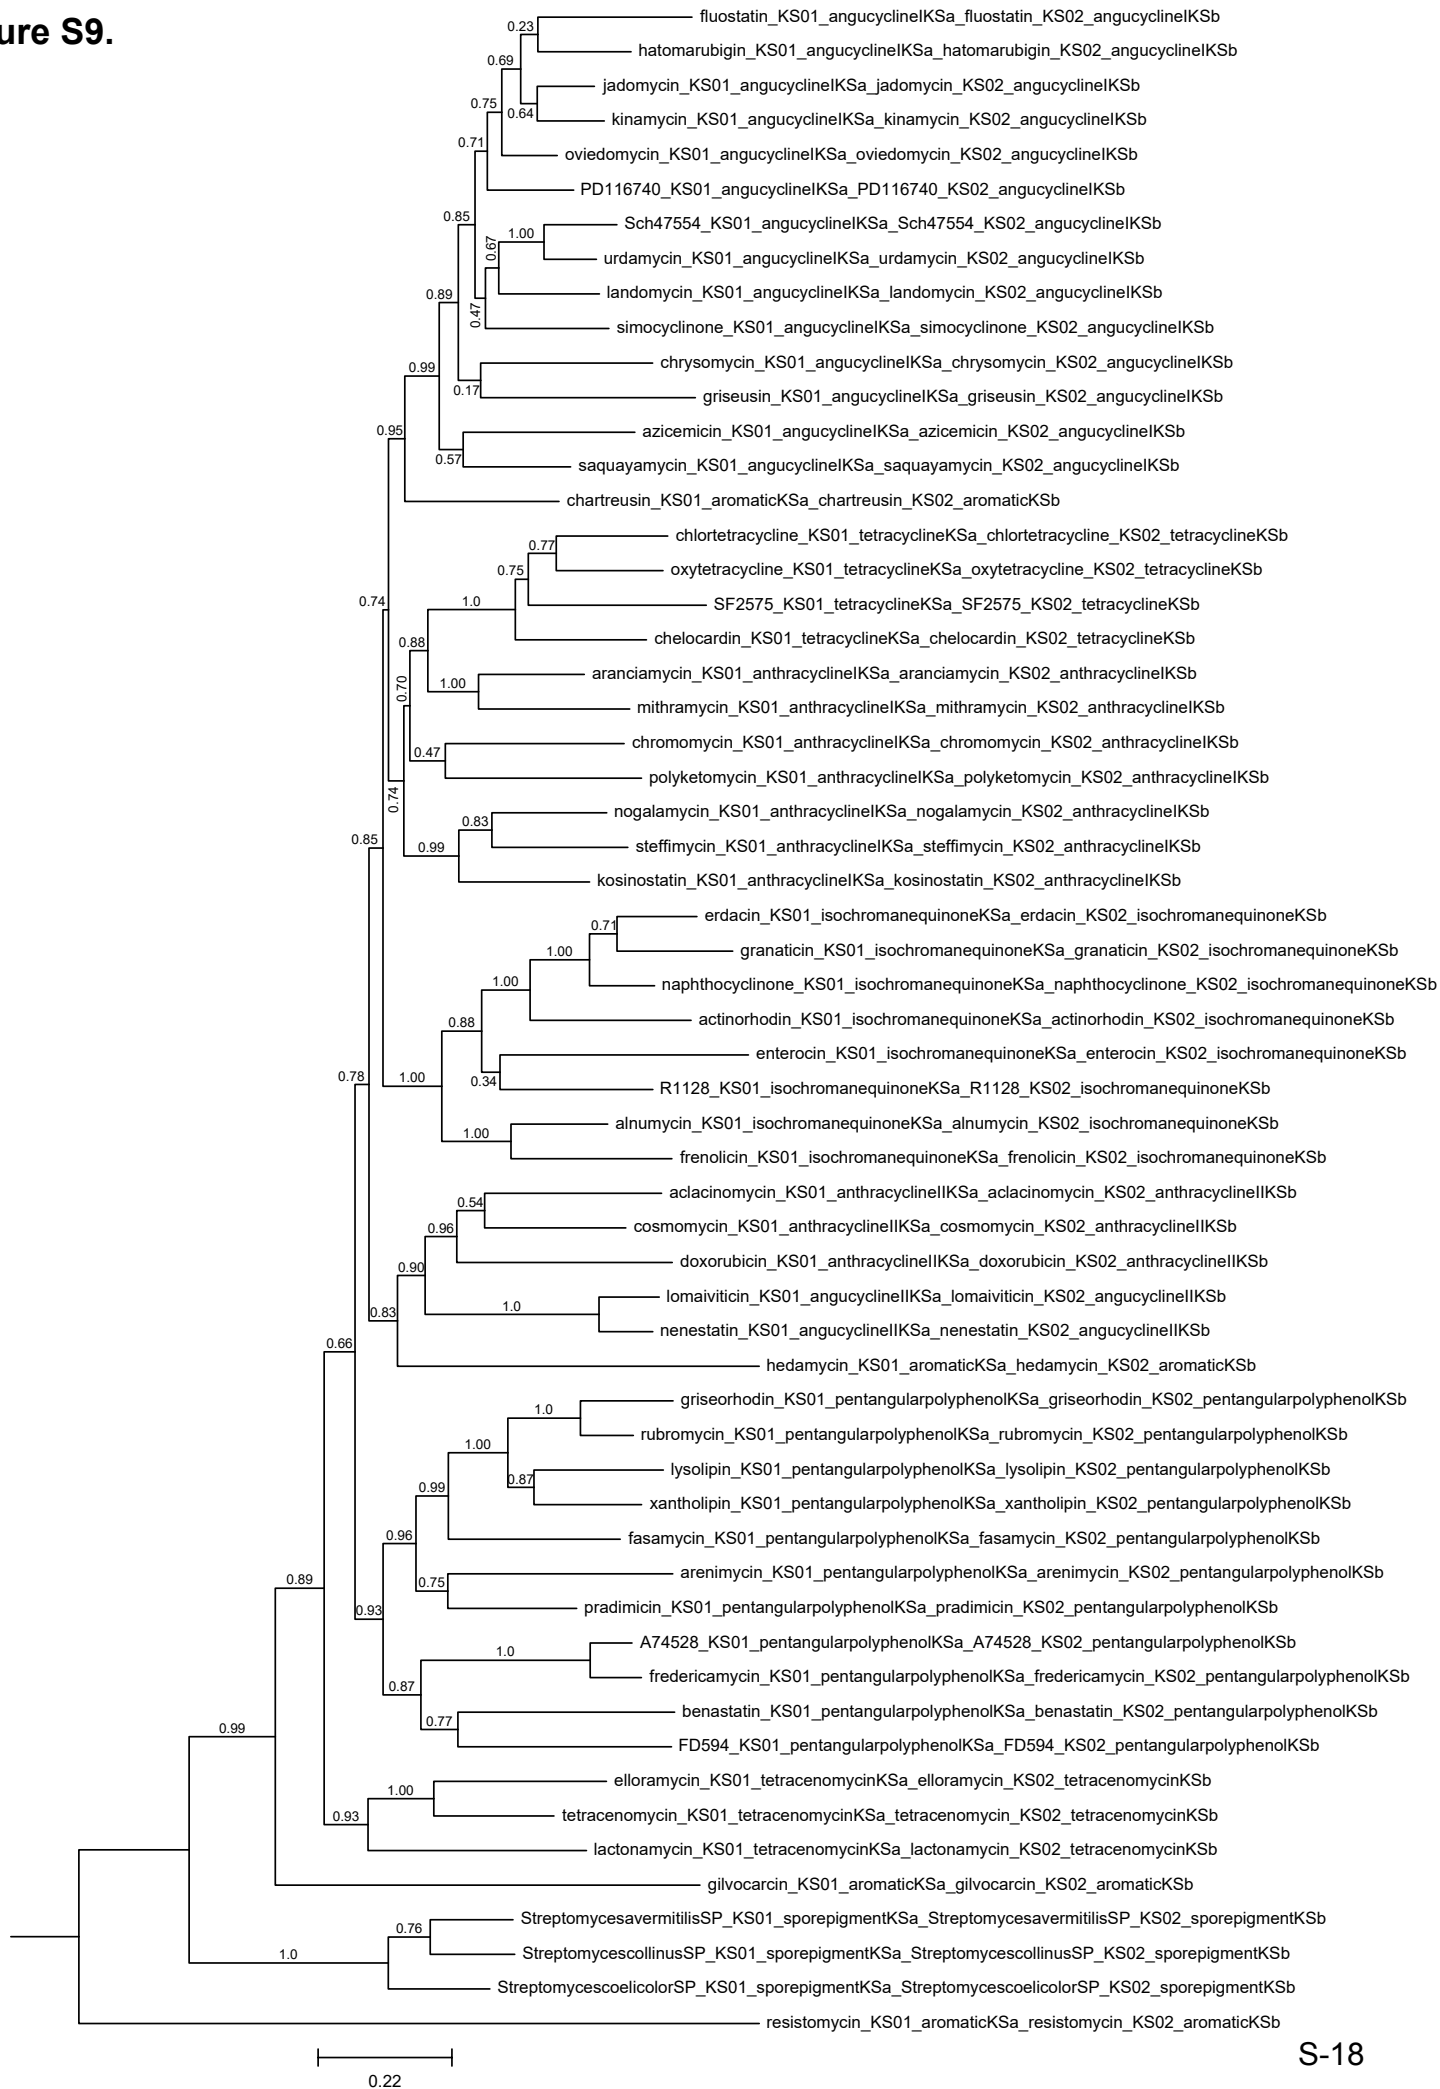

**Figure S9. Maximum likelihood type II aromatic KS phylogeny of concatenated KS $\alpha$  and KS $\beta$  sequences from 59 biosynthetic gene clusters.** The full name of each sequence is listed on the branch tips, which can help link a query match to a specific location in the tree. Bootstrap support is listed for each node.

### A. CDD Condensing Enzyme Superfamily: 634

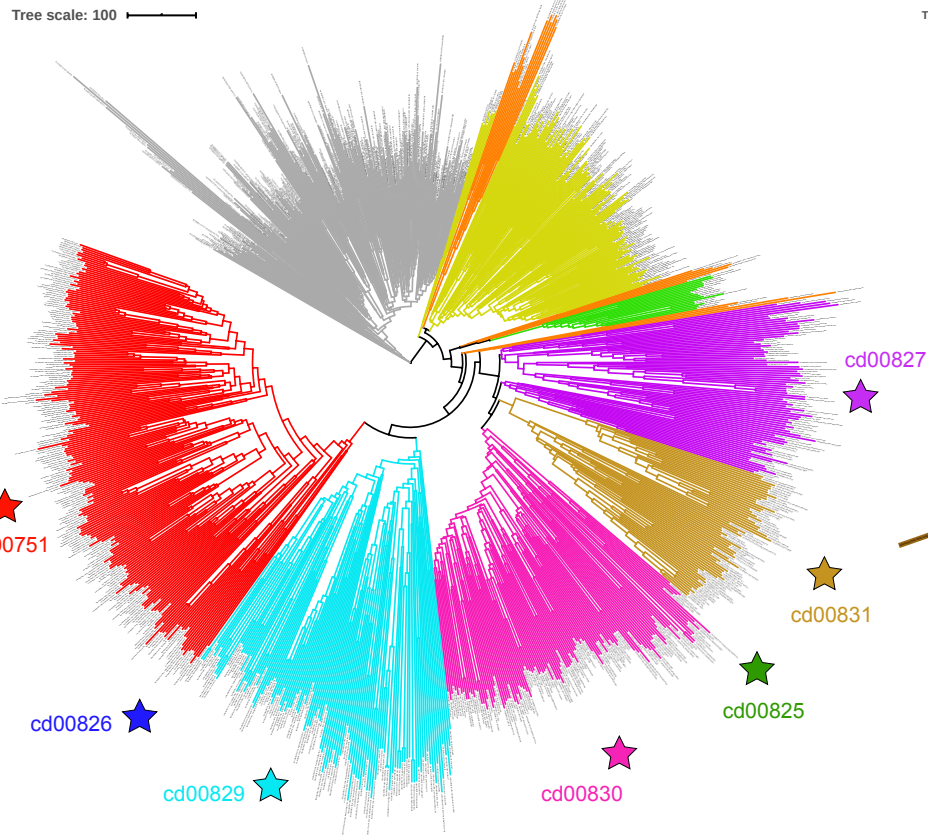

### B. NaPDoS2 database sequences: 1877

Figure S10.

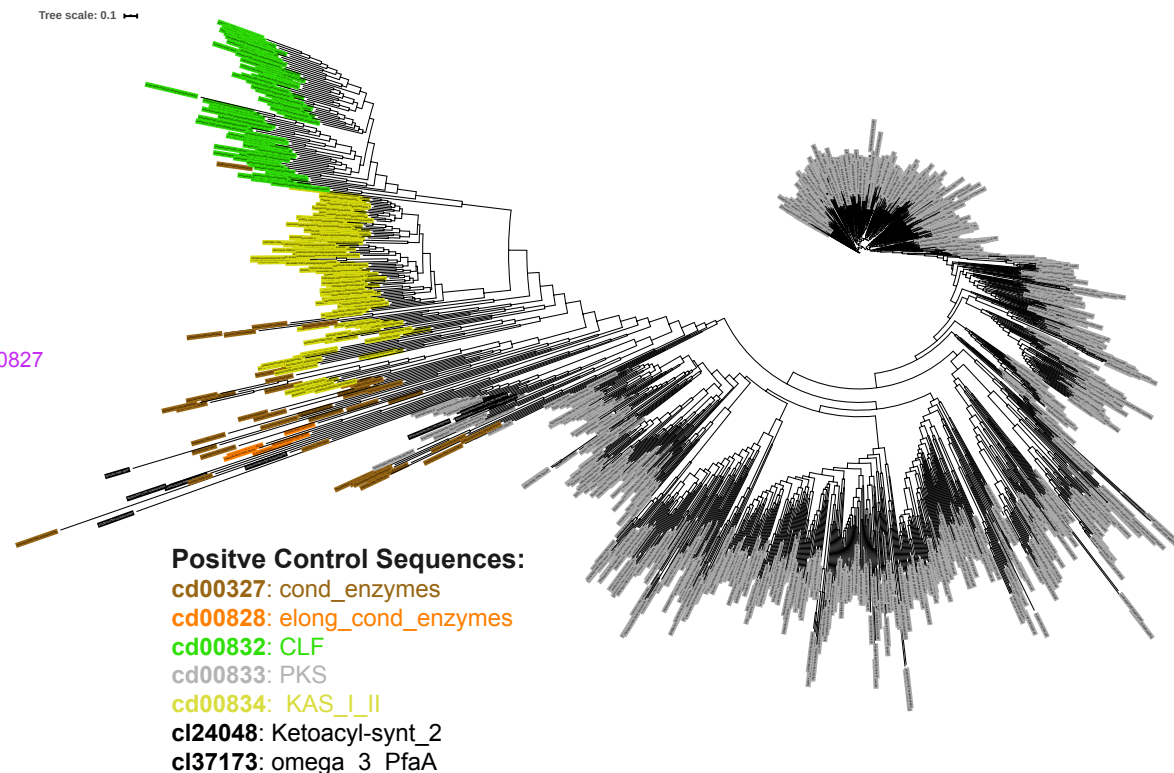

### C. Jiang et al. 2008 tree: 49

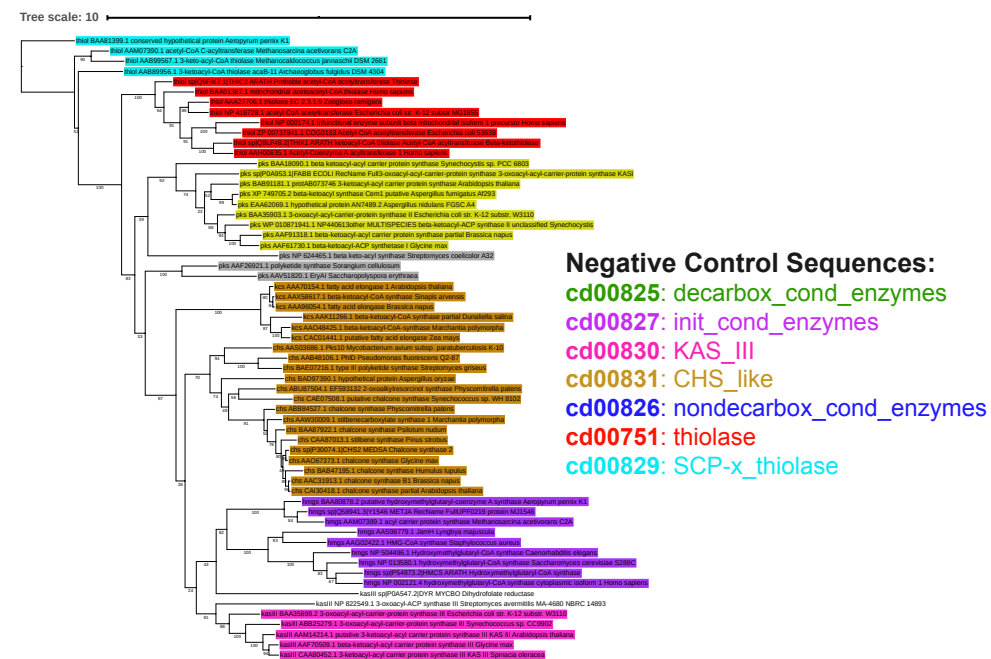

### D. Type III PKS MIBiG 2.0: 14

| Accession  | Main Product                                                                                                                                                                               | Biosynthetic Class                               | Organism                                        | KS Sequence                                                                                  |
|------------|--------------------------------------------------------------------------------------------------------------------------------------------------------------------------------------------|--------------------------------------------------|-------------------------------------------------|----------------------------------------------------------------------------------------------|
| BGC0000189 | 3-(2'-hydroxy-3'-oxo-4'-methylpentyl)-indole<br>3-(2'-hydroxy-3'-oxo-4'-methylhexyl)-indole<br>3-(2'-acetoxy-3'-oxo-4'-methylpentyl)-indole<br>3-(2'-acetoxy-3'-oxo-4'-methylhexyl)-indole | Type III Polyketide                              | <i>Xenorhabdus bovienii</i> SS-2004             | <a href="#">XBj1_3898</a><br><a href="#">XBj1_3900</a>                                       |
| BGC0000285 | flaviolin rhamnoside<br>3,3'-diflaviolin                                                                                                                                                   | Type III Polyketide<br>Oligosaccharide           | <i>Saccharopolyspora erythraea</i>              | <a href="#">rppA</a>                                                                         |
| BGC0001064 | cylindrocyclophane D<br>cylindrocyclophane E<br>cylindrocyclophane F                                                                                                                       | Modular Type I Polyketide<br>Type III Polyketide | <i>Cylindrospermum licheniforme</i> UTEX B 2014 | <a href="#">AFV96140</a><br><a href="#">AFV96143</a>                                         |
| BGC0001079 | napyradiomycin A80915C                                                                                                                                                                     | Terpene<br>Type III Polyketide                   | <i>Streptomyces aculeolatus</i>                 | <a href="#">napT1</a><br><a href="#">napB1</a>                                               |
| BGC0001083 | merochlorin A, merochlorin B<br>deschloro-merochlorin A, deschloro-merochlorin B<br>isochloro-merochlorin B, dichloro-merochlorin B<br>merochlorin D, merochlorin C                        | Terpene<br>Type III Polyketide                   | <i>Streptomyces</i> sp. CNH189                  | <a href="#">mcl3</a><br><a href="#">mcl4</a><br><a href="#">mcl17</a>                        |
| BGC0001150 | pamamycin-607                                                                                                                                                                              | Type II Polyketide<br>Type III Polyketide        | <i>Streptomyces alboniger</i>                   | <a href="#">pamG</a><br><a href="#">pamD</a><br><a href="#">pamE</a><br><a href="#">pamK</a> |

**Figure S10. Negative control KS sequence selection.** All sequence accession information is listed in Table S3.

A) Distance matrix tree of 1,072 condensing enzyme superfamily (cl09938) sequences from the NCBI Conserved Domain Database<sup>6</sup> (CDD) tool CDtree<sup>7</sup>, colored by conserved domain (CD) family in iTOL<sup>8</sup> (see panel B and C keys). Stars mark CD families not represented in the NaPDoS2 database, which were selected as negative controls (634 total). The negative control CD families comprise: initiating condensing enzymes (init\_cond\_enzymes, cd00827; n=84), chalcone and stilbene synthases (CHS\_like, cd00831; n=67), decarboxylating condensing enzymes (decarbox\_cond\_enzymes, cd00825; n=3), ketoacyl-acyl carrier protein synthase III enzymes (KAS\_III, cd00830; n=130), sterol carrier protein (SCP)-x isoform-associated thiolase domains (SCP-x\_thiolase, cd00829; n=125), non-decarboxylating condensing enzymes (nondecarbox\_cond\_enzymes, cd00826; n=2), and thiolase enzymes (thiolase, cd00751; n=223).

B) Phylogenetic tree of the 1,877 NaPDoS2 KS sequences colored by CD family as determined by NCBI CD-Search<sup>6</sup> (see key). These sequences, which are associated with experimentally verified PKS and FAS biosynthetic gene clusters (BGCs), were selected as positive controls. The 1,877 NaPDoS2 KS sequences were aligned using MUSCLE<sup>9</sup>; the phylogenetic tree was calculated using FastTreeMP<sup>10</sup> on the CIPRES Science Gateway<sup>11</sup> and visualized in iTOL<sup>8</sup>. The NaPDoS2 database positive control CD families comprise: the condensing enzymes subfamily (cond\_enzymes, cd00327; n=39), the elongating condensing enzyme subfamily (elong\_cond\_enzymes, cd00828; n=5), the chain-length factor subfamily (CLF, cd00832; n=70), the polyketide synthase PKS subfamily (PKS, cd00833; 1,649), the beta-ketoacyl-acyl carrier protein synthase (KAS) type I and II subfamily (KAS\_I\_II, cd00834; n=102), the N-terminal domain beta-ketoacyl synthase pfam13723 superfamily (cl24048; n=5), and the polyketide-type polyunsaturated fatty acid synthase omega-3 PfaA TIGR02813 superfamily (cl37173; n=7).

C) Phylogenetic tree of 61 condensing enzyme superfamily sequences from Jiang *et al* 2008<sup>12</sup>, colored by conserved domain family as determined by NCBI CD-Search<sup>6</sup> (see panel B and C keys). Of these, 49 sequences (all but the 12 sequences colored yellow and grey) were added to the pool of negative control sequences. The 61 sequences were aligned using MUSCLE<sup>9</sup>; ProtTest 3.4.2<sup>13</sup> was used to define a model; the phylogeny was calculated with RAXML<sup>14</sup> WAG+G with 200 bootstraps; and the resulting tree visualized in iTOL<sup>8</sup>.

D) Fourteen KS domains from the six experimentally characterized type III PKS BGCs in the MIBiG 2.0<sup>5</sup> repository were also added to the pool of negative control sequences. Sequence names are colored by their CD family as determined by NCBI CD-Search<sup>6</sup>.

Figure S11.

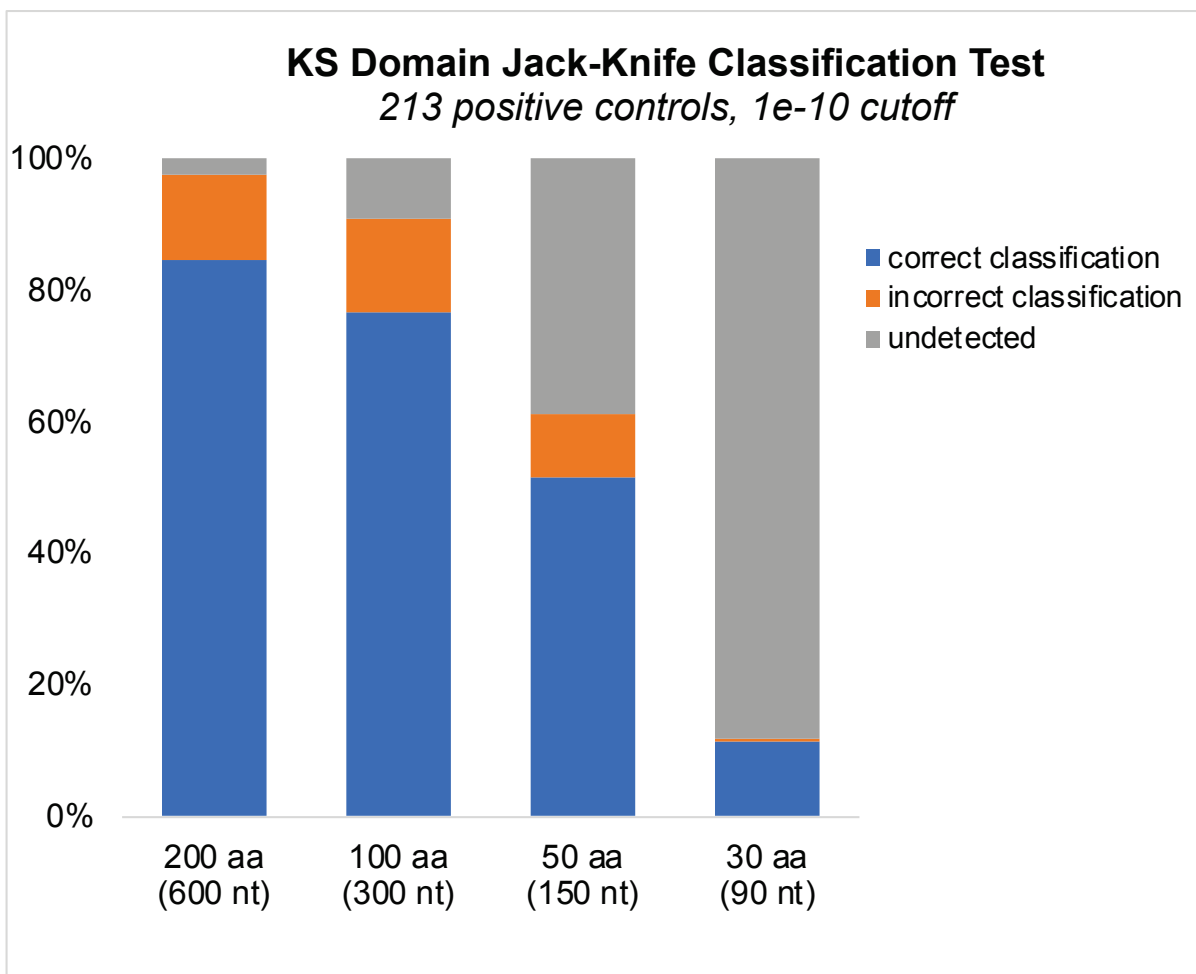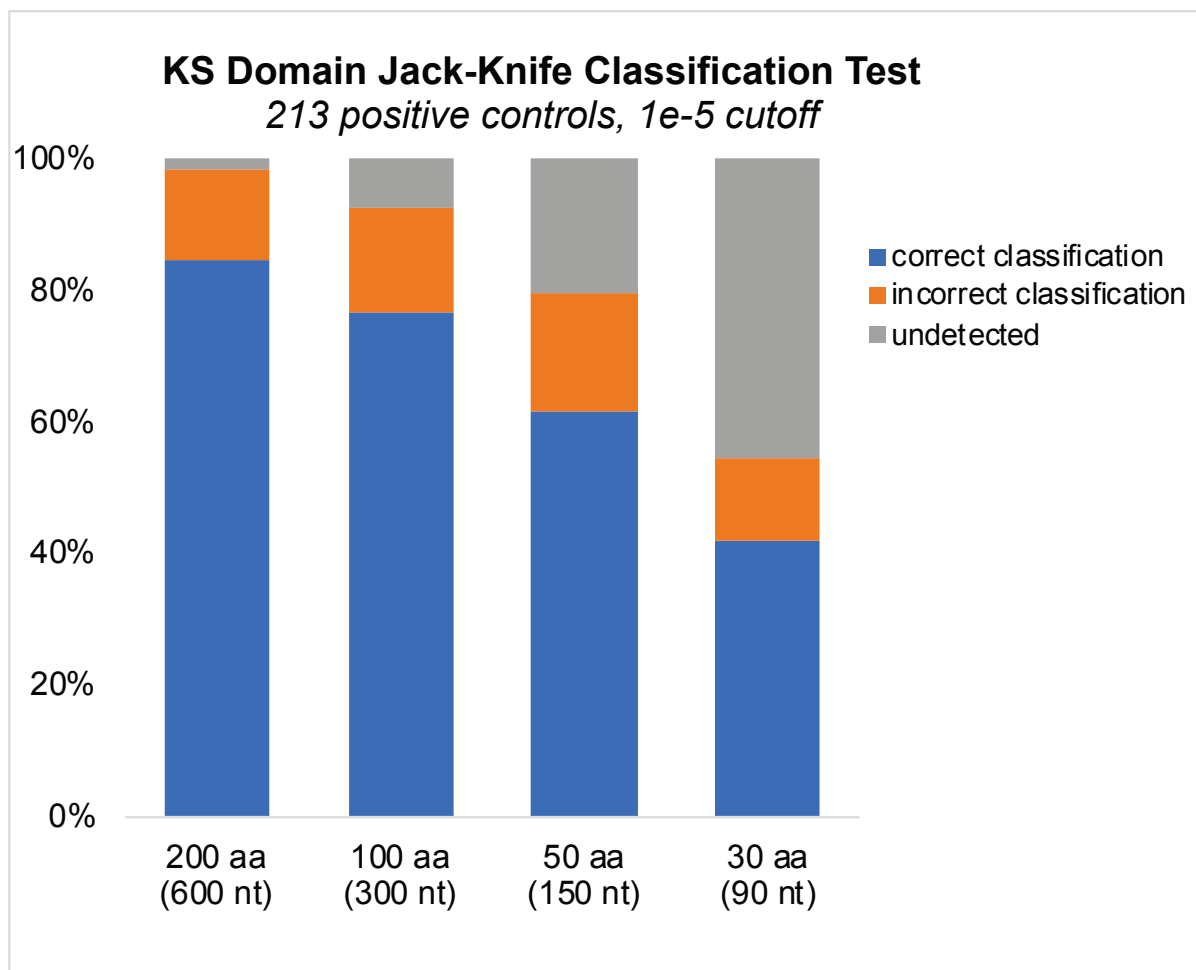

**Figure S11. Effect of query size on KS detection and classification accuracy at various E-values.** Classifications were based on varying BLASTP e-value cutoff scores as indicated for the closest non-self database match. Test sequences of varying lengths were obtained as overlapping sliding window subsequences covering the full length of 213 non-redundant, positive control KS domains.

Figure S12.

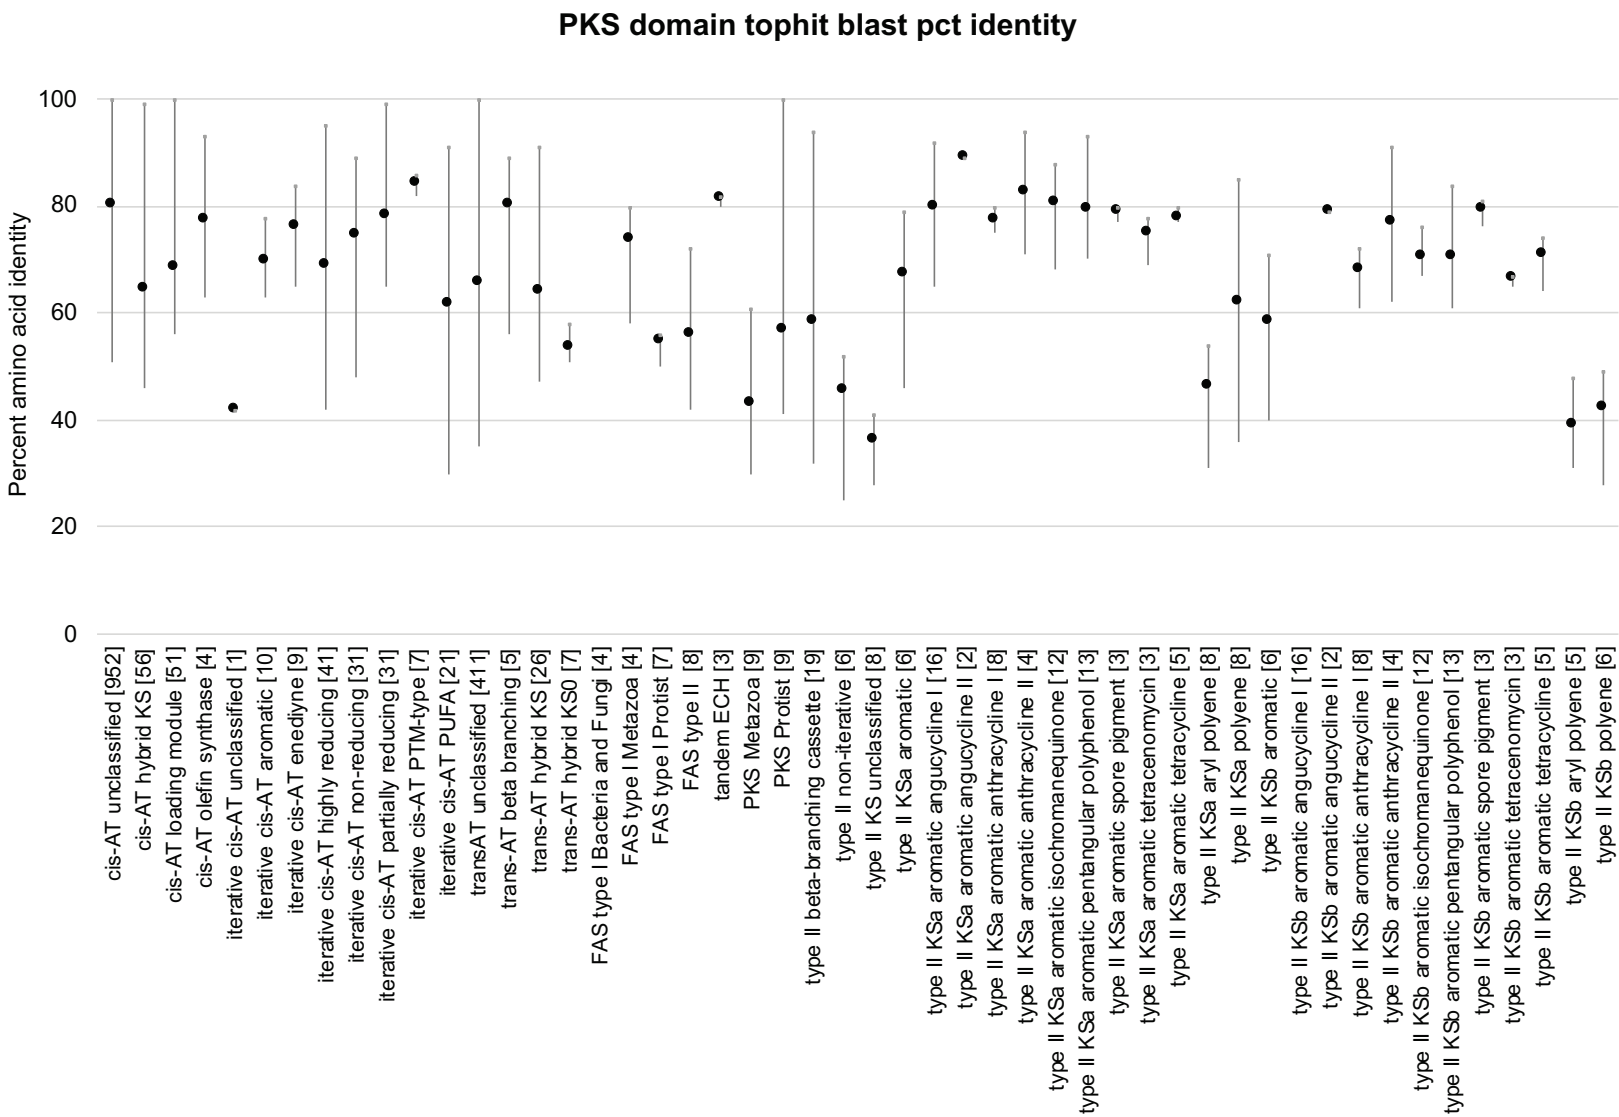



**Figure S12. KS domain sequence diversity.** Percent sequence identities were determined for each KS class in the NaPDoS2 database using an all-against-all BLASTP comparison. Mean values (points) and ranges (vertical lines) are shown for top non-self matches within each NaPDoS2 class (x-axis). Bracketed values indicate the total number of database sequences in that class.

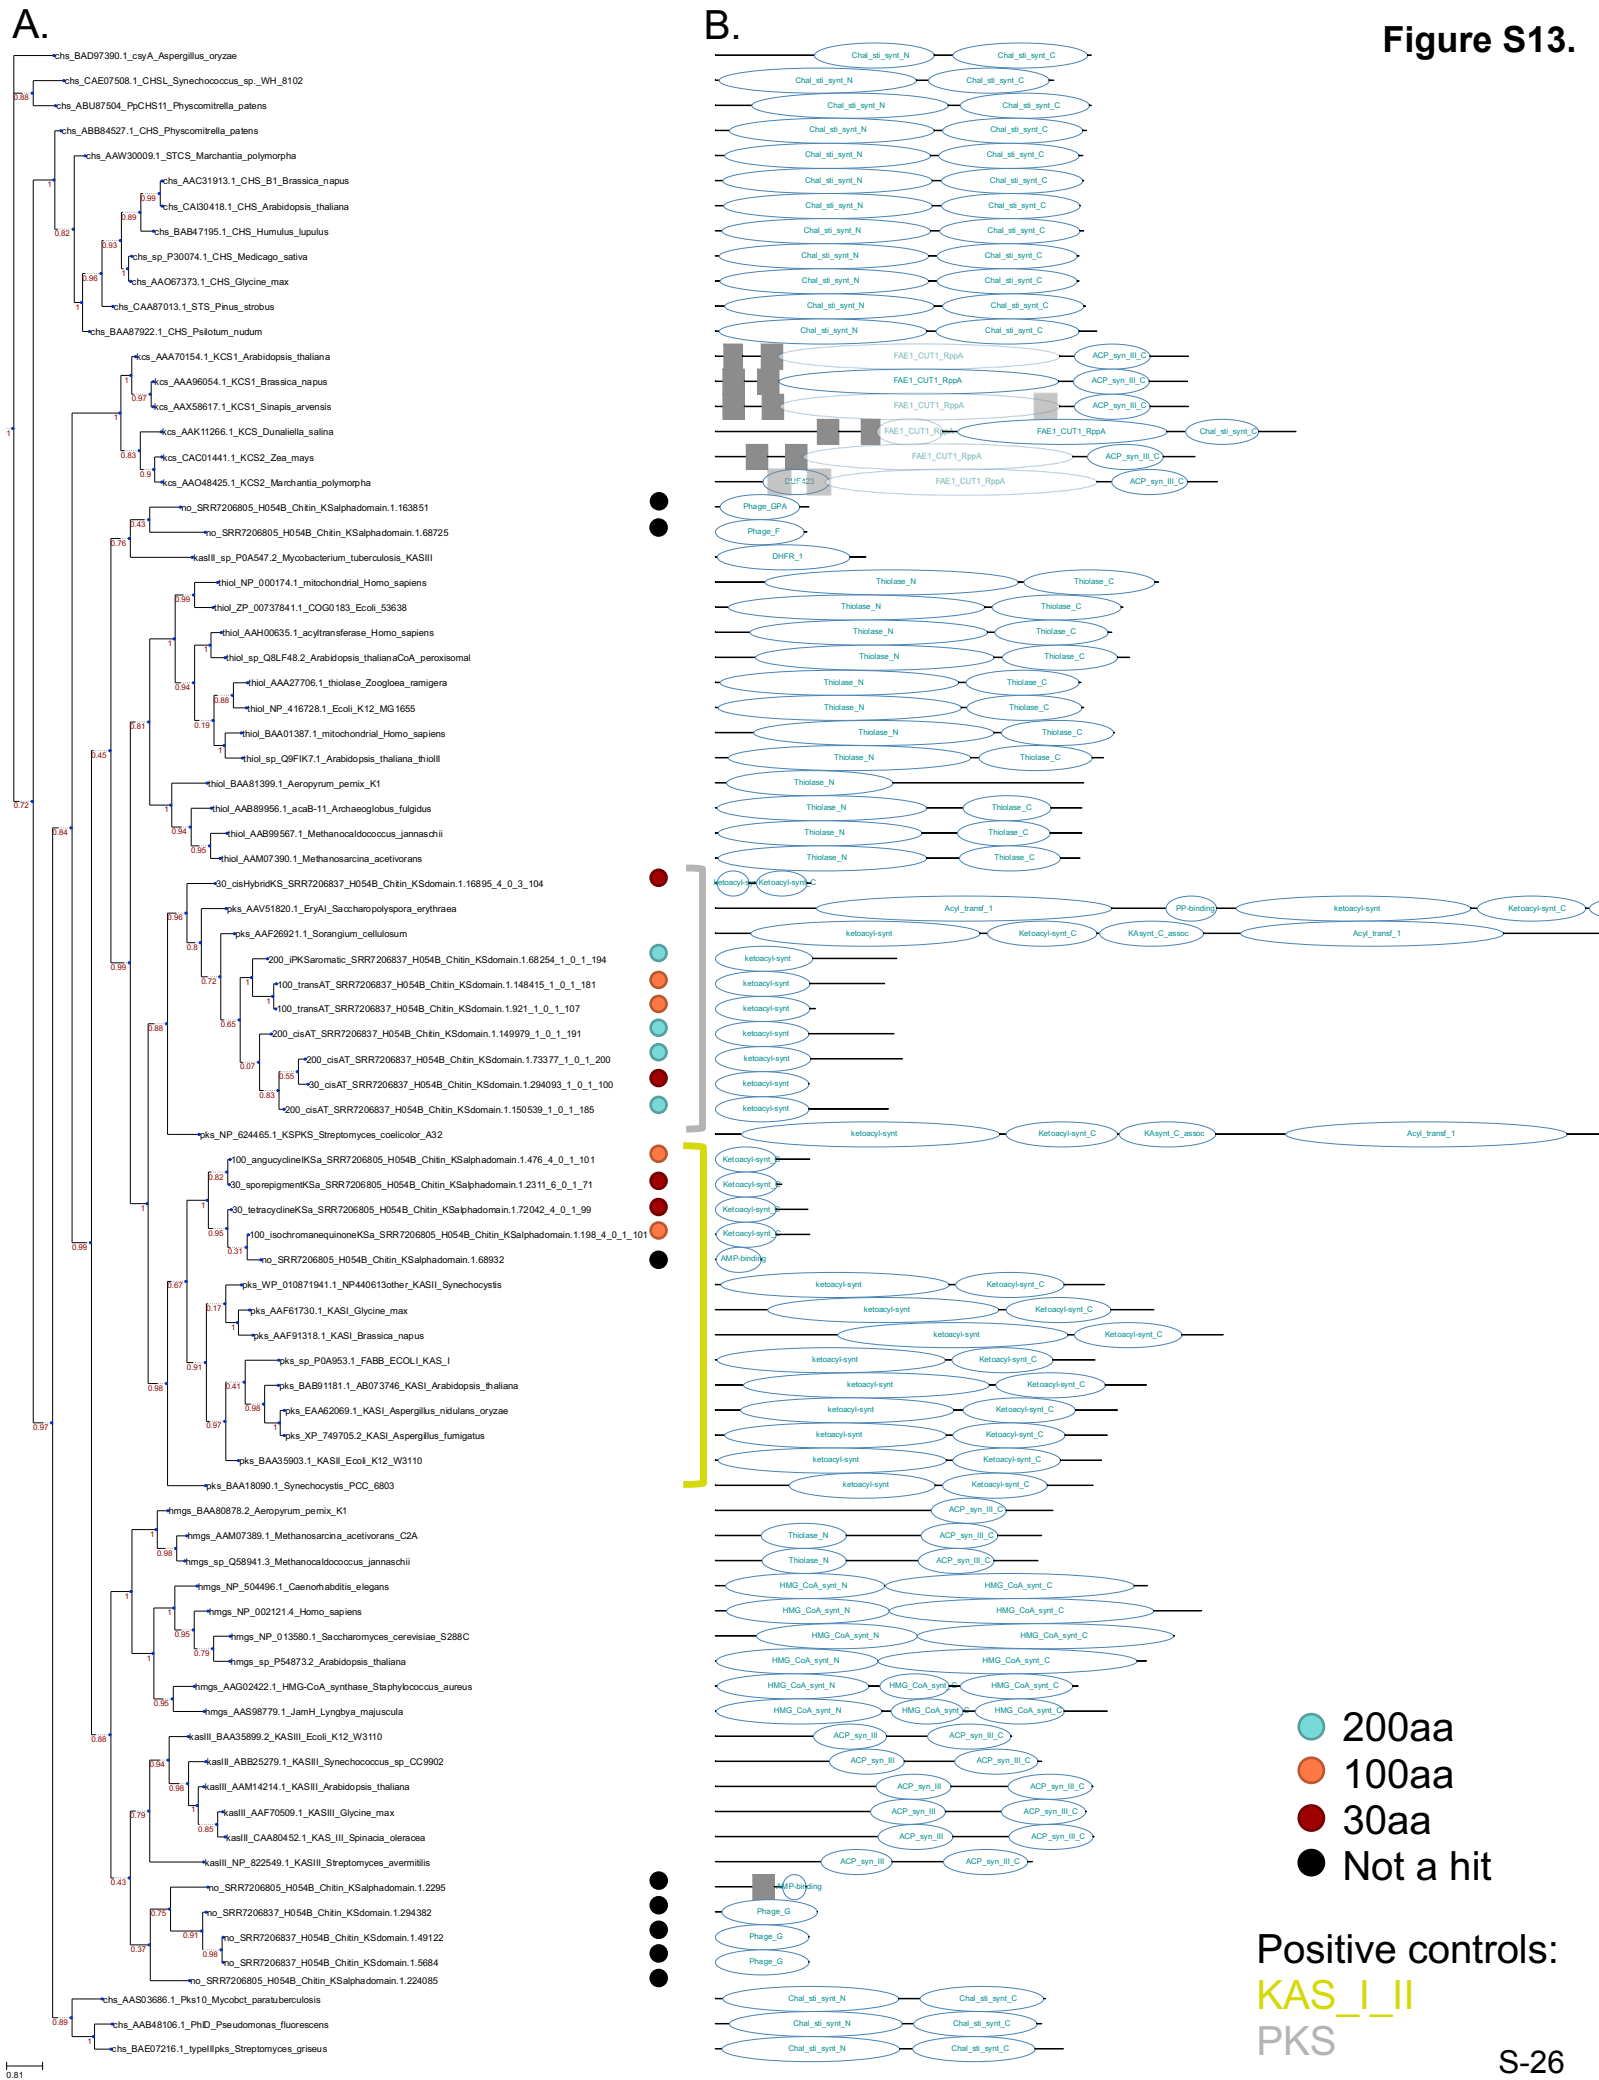

Positive controls:  
**KAS\_I\_II**  
 PKS

**Figure S13. Amplicon detection accuracy.** A) Phylogenetic tree of 20 amplicons from Elfeki *et al.* 2018<sup>15</sup> (bolded) and 61 condensing enzyme superfamily sequences from Jiang *et al.* 2008<sup>12</sup>. The 20 amplicons from Elfeki *et al.* 2018<sup>15</sup> (bolded) were detected by NaPDoS2 at 30aa, 100aa, or 200aa minimum alignment lengths (red, orange, or teal circle, respectively) or not detected (not a “hit”) at any alignment length (black circle). Grey and yellow brackets include positive control KS sequences as described in Figure S10. B) The conserved domains of all sequences as defined by TREND<sup>16</sup> (<http://trend.zhulinlab.org/>) from the NCBI conserved domain database are illustrated (gray squares are predicted transmembrane regions). The example “KS” amplicons not detected by NaPDoS2 are off-target amplifications with conserved domains relating to phage proteins. The KS amplicons detected by NaPDoS2 cluster within the PKS and KAS\_I\_II conserved domain positive control sequences from type I and II PKSs, respectively.

Abbreviations in (A) taxa branches from Jiang *et al.* 2008<sup>12</sup> are as listed in Figure S10; sequences from Elfeki *et al.* 2018<sup>15</sup> are annotated with the minimum amino acid alignment length setting/or “no” for “not a hit”, NaPDoS2 classification, SRA dataset, sample information, and NaPDoS2 domain range.

Abbreviations in (B) conserved domains as defined by TREND<sup>16</sup>.

## Table S1.

**Table S1. Typical NaPDoS pipeline processing times for genomic, PCR amplicon, and metagenomic data sets for the original NaPDoS release (V1) and NaPDoS2 (V2).** Initial data upload times are not included, as they vary widely according to internet connection speed. Matches were analyzed using a minimum alignment length of 200 amino acids for all data sets except the 243 nt amplicons, which were screened using a 50 amino acid cutoff value. Dashes indicate missing values for queries that could not be analyzed in NaPDoS version 1 because they exceeded maximum size limitations (50,000 sequences or 30 MB file size). Limits in NaPDoS Version 2 have been increased to 500,000 sequences or 500 MB file size.

| Data set                                                          | Type                             | Acession numbers | File size (MB) | Input seqs | V1 sec | V2 sec | Num. domain matches |
|-------------------------------------------------------------------|----------------------------------|------------------|----------------|------------|--------|--------|---------------------|
| <i>Salinispora arenicola</i> CNS-205, complete genome             | nucleic acid                     | GCF_000018265.1  | 5.9            | 1          | 106    | 10     | 33                  |
| <i>Aplysina aerophoba</i> assembled metagenome - random subsample | nucleic acid (assembled contigs) | IMG 3300002222   | 32.9           | 1,250      | 192    | 13     | 32                  |
| <i>Aplysina aerophoba</i> assembled metagenome - random subsample | nucleic acid (assembled contigs) | IMG 3300002222   | 46.1           | 2,500      | 276    | 19     | 38                  |
| <i>Aplysina aerophoba</i> assembled metagenome - random subsample | nucleic acid (assembled contigs) | IMG 3300002222   | 82.5           | 10,000     | -      | 33     | 62                  |
| <i>Aplysina aerophoba</i> assembled metagenome - random subsample | nucleic acid (assembled contigs) | IMG 3300002222   | 106.4          | 20,000     | -      | 42     | 72                  |
| <i>Aplysina aerophoba</i> assembled metagenome - random subsample | nucleic acid (assembled contigs) | IMG 3300002222   | 141            | 49,000     | -      | 57     | 87                  |
| <i>Aplysina aerophoba</i> assembled metagenome                    | nucleic acid (assembled contigs) | IMG 3300002222   | 211.4          | 219,427    | -      | 91     | 94                  |
| <i>Salinispora arenicola</i> CNS-205, complete genome             | predicted protein                | GCF_000018265.1  | 2.0            | 4,820      | 22     | 6      | 33                  |
| 23 draft bacterial genomes (MAGs) - random subsample              | predicted protein                | PRJNA320446      | 9.5            | 25,000     | 79     | 4      | 16                  |
| 23 draft bacterial genomes (MAGs) - random subsample              | predicted protein                | PRJNA320446      | 13.4           | 35,000     | 107    | 6      | 20                  |
| 23 draft bacterial genomes (MAGs) - random subsample              | predicted protein                | PRJNA320446      | 19.1           | 50,000     | 149    | 7      | 31                  |
| 23 draft bacterial genomes (MAGs)                                 | predicted protein                | PRJNA320446      | 28.1           | 73,530     | 216    | 9      | 49                  |
| <i>Aplysina aerophoba</i> assembled metagenome                    | predicted protein                | IMG 3300002222   | 70.9           | 365,131    | -      | 41     | 94                  |
| S31 Antarctic soil, KS amplicons - random subsample               | nucleic acid amplicon (243 nt)   | ERR1527879       | 1.5            | 5,000      | 50     | 8      | 3,194               |
| S31 Antarctic soil, KS amplicons                                  | nucleic acid amplicon (243 nt)   | ERR1527879       | 6.5            | 19,909     | 198    | 36     | 14,024              |

**Table S2. NaPDoS2 database summary.** Table lists the number of KS domains and their phylum level assignments for each class and subclass.

Table S2.

| Class                            | Subclass                                    | Bacteria     | Fungi     | Other Eukaryota | Total (across all taxa) |
|----------------------------------|---------------------------------------------|--------------|-----------|-----------------|-------------------------|
| <b>Polyketide Synthases</b>      |                                             |              |           |                 |                         |
| type I modular <i>cis</i> -AT    | olefin synthase                             | 4            |           |                 | 4                       |
|                                  | loading module                              | 51           |           |                 | 51                      |
|                                  | hybrid KS                                   | 56           |           |                 | 56                      |
|                                  | tandem ECH                                  | 3            |           |                 | 3                       |
|                                  | no subclass                                 | 952          |           |                 | 952                     |
|                                  | <b>Total</b>                                | <b>1066</b>  | <b>0</b>  | <b>0</b>        | <b>1066</b>             |
| type I iterative <i>cis</i> -AT  | PUFA (polyunsaturated fatty acids)          | 18           |           | 3               | 21                      |
|                                  | enediynes                                   | 9            |           |                 | 9                       |
|                                  | aromatic                                    | 10           |           |                 | 10                      |
|                                  | PTM-type (polycyclic tetramate macrolactam) | 7            |           |                 | 7                       |
|                                  | non-reducing                                |              | 31        |                 | 31                      |
|                                  | partially reducing                          |              | 7         |                 | 7                       |
|                                  | highly reducing                             |              | 41        |                 | 41                      |
|                                  | no subclass                                 | 1            |           |                 | 1                       |
|                                  |                                             | <b>Total</b> | <b>45</b> | <b>79</b>       | <b>3</b>                |
| type I <i>trans</i> -AT          | beta-branching module                       | 5            |           |                 | 5                       |
|                                  | hybrid KS                                   | 19           |           |                 | 19                      |
|                                  | hybrid KS0 (non-elongating KS)              | 7            |           |                 | 7                       |
|                                  | no subclass                                 | 411          |           |                 | 411                     |
|                                  | <b>Total</b>                                | <b>442</b>   | <b>0</b>  | <b>0</b>        | <b>442</b>              |
| type I Metazoa-type PKS          | no subclass                                 |              |           | 9               | 9                       |
| type I Protist-type PKS          | no subclass                                 |              |           | 9               | 9                       |
|                                  | <b>Total</b>                                | <b>0</b>     | <b>0</b>  | <b>18</b>       | <b>18</b>               |
|                                  | <b>Total</b>                                | <b>1553</b>  | <b>79</b> | <b>21</b>       | <b>1653</b>             |
| type II aromatic                 | angucycline-derived I                       | 32           |           |                 | 32                      |
|                                  | angucycline-derived II                      | 4            |           |                 | 4                       |
|                                  | anthracycline-derived I                     | 16           |           |                 | 16                      |
|                                  | anthracycline-derived II                    | 8            |           |                 | 8                       |
|                                  | isochromanequinone-derived                  | 24           |           |                 | 24                      |
|                                  | pentangular polyphenol-derived              | 26           |           |                 | 26                      |
|                                  | tetracenomycin-derived                      | 6            |           |                 | 6                       |
|                                  | tetracycline-derived                        | 10           |           |                 | 10                      |
|                                  | spore pigment                               | 6            |           |                 | 6                       |
|                                  | unclassified                                | 12           |           |                 | 12                      |
|                                  | <b>Total</b>                                | <b>144</b>   | <b>0</b>  | <b>0</b>        | <b>144</b>              |
| type II beta-branching cassettes | no subclass                                 | 19           |           |                 | 19                      |
| type II polyenes                 | KSa, Ksb                                    | 14           |           |                 | 14                      |
| type II aryl polyenes            | KSa, Ksb                                    | 13           |           |                 | 13                      |
| type II non-iterative            | no subclass                                 | 6            |           |                 | 6                       |
| type II unclassified             | no subclass                                 | 5            |           |                 | 5                       |
|                                  | <b>Total</b>                                | <b>57</b>    | <b>0</b>  | <b>0</b>        | <b>57</b>               |
|                                  | <b>Total</b>                                | <b>201</b>   | <b>0</b>  | <b>0</b>        | <b>201</b>              |
| <b>Fatty acid synthases</b>      |                                             |              |           |                 |                         |
| type I FAS                       | Bacterial-Fungal-type                       | 2            | 2         |                 | 4                       |
|                                  | Metazoan-type                               |              |           | 4               | 4                       |
|                                  | Protist-type                                |              |           | 7               | 7                       |
|                                  | <b>Total</b>                                | <b>2</b>     | <b>2</b>  | <b>11</b>       | <b>15</b>               |
| type II FAS                      | no subclass                                 | 8            |           |                 | 8                       |
|                                  | <b>Total</b>                                | <b>8</b>     | <b>0</b>  | <b>0</b>        | <b>8</b>                |
|                                  | <b>Total</b>                                | <b>10</b>    | <b>2</b>  | <b>11</b>       | <b>23</b>               |
|                                  | <b>Grand Total</b>                          | <b>1764</b>  | <b>81</b> | <b>32</b>       | <b>1877</b>             |

**Table S3. Accession numbers for negative controls, application use cases, type II aromatic KS sequences, example structures, and associated references.**

The first tab “Negative Control Sequences” lists the accession numbers for the 697 negative control sequences listed by source: NCBI Conserved Domain family outside, Jiang *et al.* 2008<sup>12</sup> tree, and MIBiG 2.0<sup>5</sup> type III PKS BGCs.

The second tab “Application Use Case Accessions” lists the sequence/dataset accession numbers for the application use cases (listed by biological source type, data type, and relevant reference).

The third tab “TypeIIAromaticKS\_AccessNum\_Refs” lists the GenBank protein ID for alpha and beta sequences, together with literature references used for the biosynthetic annotations in Figure 4 (i.e. poly-beta-keto chain length, starting unit, C-C cyclisation position).

The fourth tab “Example Structures Metadata” lists the PubMed ID/doi for the structures shown in Figures 2 and 5 along with the KS class/subclass associated with its biosynthesis, the chemical name, the BGC product name as reported in the NaPDoS2 BGCs tab, and the source species.

(provided as a Microsoft Excel file).

**Table S4. *Salinispora* spp. type II KS domains identified by NaPDoS version 1 (NaPDoS1)<sup>1</sup> and NaPDoS2.** 118 *Salinispora* genomes<sup>17</sup> were analyzed using the following default settings: NaPDoS1: HMM 1e-5 cutoff, 200aa minimum alignment length, pathway assignment BLASTP e-value 1e-5 cutoff; NaPDoS2: e-value cutoff 1e-8 and 200aa minimum alignment length. The NaPDoS1 output is limited to the total number of type II KSs detected. The NaPDoS2 output includes the total number of type II KSs (“Total NP2”) and their subclassification. KS $\alpha$  and KS $\beta$  sequences are grouped together.

Abbreviations: Betabranh= type II beta-branching cassettes; Angl-I= type II aromatic angucycline-derived I; Angl-II= type II aromatic angucycline-derived II; Anth-I= type II aromatic anthracycline-derived I; Isochrom= type II aromatic isochromanequinone-derived; Polyphen= type II aromatic pentangular polyphenol-derived; Unclass= type II aromatic unclassified; Type II-uc= type II unclassified no subclass.



**Table S4.**

| Species                | # genomes | NaPDoS1 |           | NaPDoS2  |         |          |         |        |          |          |    |         |            |
|------------------------|-----------|---------|-----------|----------|---------|----------|---------|--------|----------|----------|----|---------|------------|
|                        |           | Type II | Total NP2 | Betabran | Polyene | Aromatic |         |        |          |          |    | Unclass | Type II-uc |
|                        |           |         |           |          |         | Angl-I   | Angl-II | Anth-I | Isochrom | Polyphen |    |         |            |
| <i>S. tropica</i>      | 12        | 48      | 108       | -        | 60      | -        | 24      | -      | -        | -        | 24 | -       | -          |
| <i>S. fenicalii</i>    | 2         | 12      | 24        | -        | 12      | 4        | 4       | -      | -        | 4        | -  | -       |            |
| <i>S. cortesiana</i>   | 1         | 4       | 5         | -        | 1       | -        | 2       | -      | -        | 2        | -  | -       |            |
| <i>S. mooreana</i>     | 3         | 8       | 15        | -        | 7       | -        | -       | -      | 2        | 6        | -  | -       |            |
| <i>S. oceanensis</i>   | 12        | 44      | 44        | -        | -       | 8        | -       | 6      | 4        | 26       | -  | -       |            |
| <i>S. goodfellowii</i> | 1         | 4       | 5         | -        | 1       | -        | 2       | -      | -        | 2        | -  | -       |            |
| <i>S. vitiensis</i>    | 3         | 12      | 28        | -        | 14      | -        | 6       | -      | -        | 6        | -  | 2       |            |
| <i>S. pacifica</i>     | 23        | 97      | 126       | -        | 27      | -        | 46      | -      | 4        | 46       | -  | 3       |            |
| <i>S. arenicola</i>    | 61        | 134     | 307       | 2        | 173     | -        | -       | 4      | -        | 126      | 2  | -       |            |

**Table S5. Complete list of *Salinispora* spp. KS domains identified by NaPDoS2.** 118 *Salinispora* genomes<sup>17</sup> were analyzed using default settings (e-value cutoff 1e-8 and 200aa minimum alignment length). Table lists the number of KSs detected and their classification by strain. The summed total number of KSs found in each strain is listed as “NP2 Total”. KS $\alpha$  and KS $\beta$  sequences are grouped together.

Abbreviations: Betabranh= type II beta-branching cassettes; Angl-I= type II aromatic angucycline-derived I; Angl-II= type II aromatic angucycline-derived II; Anth-I= type II aromatic anthracycline-derived I; Isochrom= type II aromatic isochromanequinone-derived; Polyphen= type II aromatic pentangular polyphenol-derived; Unclass= type II aromatic unclassified; Type II-uc= type II unclassified no subclass; *cis*-AT= type I modular *cis*-AT; cisloading= type I modular *cis*-AT loading module; cisHybridKS= type I modular *cis*-AT hybrid KS; Ened= type I iterative *cis*-AT enediynes; iPKSaromatic= type I iterative *cis*-AT aromatic; PTM= type I iterative *cis*-AT PTM-type (polycyclic tetramate macrolactam); *trans*-AT= type I *trans*-AT no subclass; *trans*-hybridKS0= type I *trans*-AT hybrid KS0 (non-elongating KS).

Table S5.

NaPDoS2: KS classes

| Species                | Strain          | NP2<br>Total | FAS    |          | Type II PKS |          |        |         |          |           |        | Type I PKS     |            |                  |      |              |          |          |                 |   |
|------------------------|-----------------|--------------|--------|----------|-------------|----------|--------|---------|----------|-----------|--------|----------------|------------|------------------|------|--------------|----------|----------|-----------------|---|
|                        |                 |              | FAS II | Betabran | Polyene     | Aromatic |        |         |          | Typell-uc | cis-AT | cis-AT modular |            | cis-AT iterative |      |              | trans-AT |          |                 |   |
|                        |                 |              |        |          |             | Angl-I   | Anth-I | Isocrom | Polyphen |           |        | Unclas         | cisloading | cisHybridKS      | Ened | iPKSaromatic | PTM      | trans-AT | trans-hybridKS0 |   |
| <i>S. tropica</i>      | CNB440          | 28           | 2      |          | 5           |          | 2      |         |          | 2         |        |                | 12         | 1                | 2    | 2            |          |          |                 |   |
| <i>S. tropica</i>      | CNB476          | 22           | 2      |          | 5           |          | 2      |         |          | 2         |        |                | 6          | 1                | 3    | 1            |          |          |                 |   |
| <i>S. tropica</i>      | CNB536          | 29           | 3      |          | 5           |          | 2      |         |          | 2         |        |                | 12         | 1                | 3    | 1            |          |          |                 |   |
| <i>S. tropica</i>      | CNH898          | 27           | 4      |          | 5           |          | 2      |         |          | 2         |        |                | 10         | 1                | 2    | 1            |          |          |                 |   |
| <i>S. tropica</i>      | CNR699          | 24           | 2      |          | 5           |          | 2      |         |          | 2         |        |                | 8          | 1                | 2    | 2            |          |          |                 |   |
| <i>S. tropica</i>      | CNS197          | 24           | 2      |          | 5           |          | 2      |         |          | 2         |        |                | 8          | 1                | 2    | 2            |          |          |                 |   |
| <i>S. tropica</i>      | CNS416          | 24           | 2      |          | 5           |          | 2      |         |          | 2         |        |                | 9          | 1                | 2    | 1            |          |          |                 |   |
| <i>S. tropica</i>      | CNT250          | 24           | 2      |          | 5           |          | 2      |         |          | 2         |        |                | 8          | 1                | 2    | 2            |          |          |                 |   |
| <i>S. tropica</i>      | CNT261          | 27           | 3      |          | 5           |          | 2      |         |          | 2         |        |                | 8          | 1                | 5    | 1            |          |          |                 |   |
| <i>S. tropica</i>      | CNY012          | 24           | 3      |          | 5           |          | 2      |         |          | 2         |        |                | 8          | 1                | 2    | 1            |          |          |                 |   |
| <i>S. tropica</i>      | CNY678          | 24           | 2      |          | 5           |          | 2      |         |          | 2         |        |                | 8          | 1                | 2    | 2            |          |          |                 |   |
| <i>S. tropica</i>      | CNY681          | 24           | 2      |          | 5           |          | 2      |         |          | 2         |        |                | 8          | 1                | 2    | 2            |          |          |                 |   |
| <i>S. fenicalii</i>    | CNT569          | 30           | 2      |          | 6           | 2        | 2      |         |          | 2         |        |                | 2          | 1                | 2    | 2            |          |          | 9               |   |
| <i>S. fenicalii</i>    | CNR942          | 29           | 2      |          | 6           | 2        | 2      |         |          | 2         |        |                | 2          | 1                | 2    | 1            |          |          | 9               |   |
| <i>S. cortesiana</i>   | CNY202          | 13           | 4      |          | 1           |          | 2      |         |          | 2         |        |                | 2          |                  | 1    | 1            |          |          |                 |   |
| <i>S. mooreana</i>     | CNY646          | 24           | 5      |          | 5           |          |        |         |          | 2         |        |                | 7          | 2                | 2    | 1            |          |          |                 |   |
| <i>S. mooreana</i>     | CNS237          | 48           | 4      |          | 1           |          |        |         |          | 2         |        |                | 34         | 3                | 2    | 2            |          |          |                 |   |
| <i>S. mooreana</i>     | CNT150_DSM45549 | 13           | 4      |          | 1           |          |        | 2       |          | 2         |        |                | 2          |                  |      | 2            |          |          |                 |   |
| <i>S. oceanensis</i>   | CNT854          | 10           | 4      |          |             |          |        |         |          | 2         |        |                | 1          |                  | 1    | 1            | 1        |          |                 |   |
| <i>S. oceanensis</i>   | CNT584          | 13           | 4      |          |             | 4        |        |         |          | 2         |        |                | 1          |                  | 1    | 1            |          |          |                 |   |
| <i>S. oceanensis</i>   | CNT124          | 13           | 4      |          |             | 4        |        |         |          | 2         |        |                | 1          |                  | 1    | 1            |          |          |                 |   |
| <i>S. oceanensis</i>   | CNT138_DSM45547 | 30           | 4      |          |             |          |        |         |          | 4         |        |                | 17         | 1                | 2    | 1            |          |          | 1               |   |
| <i>S. oceanensis</i>   | CNT029          | 9            | 4      |          |             |          |        |         |          | 2         |        |                | 1          |                  | 1    | 1            |          |          |                 |   |
| <i>S. oceanensis</i>   | CNY703          | 9            | 4      |          |             |          |        |         |          | 2         |        |                | 1          |                  | 1    | 1            |          |          |                 |   |
| <i>S. oceanensis</i>   | CNY673          | 11           | 4      |          |             |          | 2      |         |          | 2         |        |                | 1          |                  | 1    | 1            |          |          |                 |   |
| <i>S. oceanensis</i>   | CNT045          | 21           | 6      |          |             |          |        |         |          | 2         |        |                | 4          | 4                | 3    | 1            | 1        |          |                 |   |
| <i>S. oceanensis</i>   | CNS996          | 23           | 6      |          |             |          | 2      |         |          | 2         |        |                | 4          | 5                | 3    | 1            |          |          |                 |   |
| <i>S. oceanensis</i>   | CNT403          | 16           | 5      |          |             |          | 2      |         |          | 2         |        |                | 2          | 2                | 2    | 1            |          |          |                 |   |
| <i>S. oceanensis</i>   | CNS860          | 15           | 5      |          |             |          |        | 2       |          | 2         |        |                | 1          | 2                | 2    | 1            |          |          |                 |   |
| <i>S. oceanensis</i>   | CNS863_DSM45543 | 16           | 5      |          |             |          |        | 2       |          | 2         |        |                | 2          | 2                | 2    | 1            |          |          |                 |   |
| <i>S. goodfellowii</i> | CNY666          | 50           | 2      |          | 1           |          | 2      |         |          | 2         |        |                | 38         | 1                | 2    | 1            |          |          | 1               |   |
| <i>S. vitiensis</i>    | CNS055          | 20           | 1      |          | 4           |          | 2      |         |          | 2         |        |                | 9          |                  | 1    | 1            |          |          |                 |   |
| <i>S. vitiensis</i>    | CNT148_DSM45548 | 15           | 3      |          | 5           |          | 2      |         |          | 2         |        | 1              | 1          |                  | 1    |              |          |          |                 |   |
| <i>S. vitiensis</i>    | CNS801          | 15           | 3      |          | 5           |          | 2      |         |          | 2         |        | 1              | 1          |                  | 1    |              |          |          |                 |   |
| <i>S. pacifica</i>     | CNH732          | 20           | 2      |          | 1           |          | 2      |         |          | 2         |        |                | 9          |                  | 3    | 1            |          |          |                 |   |
| <i>S. pacifica</i>     | CNQ768          | 19           | 2      |          | 1           |          | 2      |         |          | 2         |        |                | 8          |                  | 3    | 1            |          |          |                 |   |
| <i>S. pacifica</i>     | CNR114          | 20           | 2      |          | 1           |          | 2      |         |          | 2         |        |                | 10         | 1                | 1    | 1            |          |          |                 |   |
| <i>S. pacifica</i>     | CNR510          | 23           | 2      |          | 1           |          | 2      |         |          | 2         |        |                | 11         | 1                | 3    | 1            |          |          |                 |   |
| <i>S. pacifica</i>     | CNR894          | 20           | 2      |          | 1           |          | 2      |         |          | 2         |        |                | 9          |                  | 3    | 1            |          |          |                 |   |
| <i>S. pacifica</i>     | CNR909          | 21           | 3      |          | 1           |          | 2      |         |          | 2         |        |                | 10         |                  | 1    | 1            | 1        |          |                 |   |
| <i>S. pacifica</i>     | CNS103          | 23           | 3      |          | 1           |          | 2      |         |          | 2         |        |                | 11         | 1                | 2    | 1            |          |          |                 |   |
| <i>S. pacifica</i>     | CNT001          | 23           | 2      |          | 1           |          | 2      |         |          | 2         |        |                | 11         | 1                | 3    | 1            |          |          |                 |   |
| <i>S. pacifica</i>     | CNT003          | 28           | 3      |          | 1           |          | 2      |         |          | 2         |        |                | 16         | 1                | 1    | 1            |          |          | 1               |   |
| <i>S. pacifica</i>     | CNT084          | 28           | 4      |          | 1           |          | 2      |         |          | 2         |        |                | 14         | 2                | 1    | 1            | 1        |          |                 |   |
| <i>S. pacifica</i>     | CNT131          | 30           | 2      |          | 1           |          | 2      |         |          | 2         |        |                | 17         | 1                | 3    | 1            |          |          | 1               |   |
| <i>S. pacifica</i>     | CNT133          | 29           | 4      |          | 1           |          | 2      |         |          | 2         |        |                | 15         | 2                | 1    | 1            | 1        |          |                 |   |
| <i>S. pacifica</i>     | CNT603          | 20           | 2      |          | 1           |          | 2      |         |          | 2         |        |                | 9          |                  | 3    | 1            |          |          |                 |   |
| <i>S. pacifica</i>     | CNT609          | 26           | 3      |          | 1           |          | 2      |         |          | 2         |        | 1              | 13         | 2                | 1    | 1            |          |          |                 |   |
| <i>S. pacifica</i>     | CNT796          | 21           | 2      |          | 1           |          | 2      |         | 2        | 2         |        |                | 10         |                  | 1    | 1            |          |          |                 |   |
| <i>S. pacifica</i>     | CNT851          | 20           | 2      |          | 1           |          | 2      |         | 2        | 2         |        |                | 9          |                  | 1    | 1            |          |          |                 |   |
| <i>S. pacifica</i>     | CNT855          | 21           | 2      |          | 2           |          | 2      |         |          | 2         |        | 1              | 10         |                  | 1    | 1            |          |          |                 |   |
| <i>S. pacifica</i>     | CNY239          | 20           | 2      |          | 1           |          | 2      |         |          | 2         |        |                | 8          |                  | 4    | 1            |          |          |                 |   |
| <i>S. pacifica</i>     | CNY330          | 32           | 2      |          | 1           |          | 2      |         |          | 2         |        |                | 23         |                  | 1    | 1            |          |          |                 |   |
| <i>S. pacifica</i>     | CNY331          | 37           | 2      |          | 2           |          | 2      |         |          | 2         |        |                | 26         | 1                | 1    | 1            |          |          |                 |   |
| <i>S. pacifica</i>     | CNY363          | 45           | 2      |          | 2           |          | 2      |         |          | 2         |        |                | 33         | 1                | 1    | 1            |          |          | 1               |   |
| <i>S. pacifica</i>     | CNY498          | 22           | 2      |          | 1           |          | 2      |         |          | 2         |        |                | 10         |                  | 3    | 1            |          |          | 1               |   |
| <i>S. pacifica</i>     | CNS960_DSM45544 | 28           | 2      |          | 2           |          | 2      |         |          | 2         |        | 1              | 14         |                  | 4    | 1            |          |          |                 |   |
| <i>S. arenicola</i>    | CNB458          | 24           | 2      |          | 2           |          |        |         |          | 2         |        |                | 13         |                  | 1    | 2            | 2        |          |                 |   |
| <i>S. arenicola</i>    | CNB527          | 29           | 2      |          | 2           |          |        |         |          | 4         |        |                | 16         |                  | 1    | 2            | 2        |          |                 |   |
| <i>S. arenicola</i>    | CNH643          | 36           | 3      |          | 4           |          |        |         |          | 2         |        |                | 21         | 1                | 2    | 2            | 1        |          |                 |   |
| <i>S. arenicola</i>    | CNH646          | 21           | 3      |          | 4           |          |        |         |          | 2         |        |                | 7          |                  | 2    | 2            | 1        |          |                 |   |
| <i>S. arenicola</i>    | CNH713          | 34           | 3      |          | 4           |          |        |         |          | 2         |        |                | 19         | 1                | 2    | 2            | 1        |          |                 |   |
| <i>S. arenicola</i>    | CNH718          | 33           | 2      |          | 2           |          |        |         |          | 2         |        |                | 20         | 1                | 1    | 2            | 2        | 1        |                 |   |
| <i>S. arenicola</i>    | CNH877          | 29           | 3      |          | 4           |          |        |         |          | 2         |        |                | 15         |                  | 2    | 2            | 1        |          |                 |   |
| <i>S. arenicola</i>    | CNH905          | 28           | 3      |          | 4           |          |        |         |          | 2         |        |                | 15         |                  | 1    | 2            | 1        |          |                 |   |
| <i>S. arenicola</i>    | CNH941          | 23           | 3      |          | 4           |          |        |         |          | 2         |        |                | 7          | 1                | 3    | 2            | 1        |          |                 |   |
| <i>S. arenicola</i>    | CNH962          | 17           | 2      |          | 2           |          |        |         |          | 2         |        |                | 8          |                  | 2    | 1            |          |          |                 |   |
| <i>S. arenicola</i>    | CNH963          | 18           | 2      |          | 2           |          |        |         |          | 2         |        |                | 9          |                  | 2    | 1            |          |          |                 |   |
| <i>S. arenicola</i>    | CNH964          | 31           | 3      | 1        | 4           |          |        |         |          | 2         |        |                | 7          | 1                | 3    | 2            | 1        |          | 6               | 1 |
| <i>S. arenicola</i>    | CNH996B         | 26           | 3      |          | 2           |          |        |         |          | 2         |        |                | 13         | 1                | 2    | 2            | 1        |          |                 |   |
| <i>S. arenicola</i>    | CNH996          | 26           | 3      |          | 2           |          |        |         |          | 2         |        |                | 13         | 1                | 2    | 2            | 1        |          |                 |   |
| <i>S. arenicola</i>    | CNP105          | 31           | 3      | 1        | 4           |          |        |         |          | 2         |        |                | 7          | 1                | 3    | 2            | 1        |          | 6               | 1 |
| <i>S. arenicola</i>    | CNP193          | 23           | 3      |          | 4           |          |        |         |          | 2         |        |                | 7          | 1                | 3    | 2            | 1        |          |                 |   |
| <i>S. arenicola</i>    | CNQ748          | 38           | 2      |          | 2           |          |        |         |          | 2         |        |                | 24         | 1                | 2    | 2            | 2        | 1        |                 |   |
| <i>S. arenicola</i>    | CNQ884          | 50           | 2      |          | 2           |          |        |         |          | 2         |        |                | 37         | 2                | 1    | 2            | 2        |          |                 |   |
| <i>S. arenicola</i>    | CNR107          | 22           | 2      |          | 3           |          |        |         |          | 2         |        |                | 8          |                  | 2    | 2            | 2        | 1        |                 |   |
| <i>S. arenicola</i>    | CNR425          | 33           | 2      |          | 2           |          |        |         |          | 2         |        |                | 20         | 1                | 2    | 2            | 2        |          |                 |   |
| <i>S. arenicola</i>    | CNR921          | 15           | 2      |          | 2           |          |        |         |          | 2         |        |                | 4          |                  | 1    | 2            | 2        |          |                 |   |
| <i>S. arenicola</i>    | CNS051          | 16           | 2      |          | 2           |          |        |         |          | 2         |        |                | 5          |                  | 1    | 2            | 2        |          |                 |   |
| <i>S. arenicola</i>    | CNS205          | 33           | 2      |          | 2           |          |        |         |          | 2         |        |                | 20         | 1                | 1    | 2            | 2        | 1        |                 |   |

Table S5.

NaPDoS2: KS classes

| Species             | Strain          | NP2<br>Total | FAS    |          | Type II PKS |          |         |        |          |          |           |        | Type I PKS     |            |                  |      |              |          |          |                 |
|---------------------|-----------------|--------------|--------|----------|-------------|----------|---------|--------|----------|----------|-----------|--------|----------------|------------|------------------|------|--------------|----------|----------|-----------------|
|                     |                 |              | FAS II | Betabran | Polyene     | Aromatic |         |        |          |          | TypeII-uc | cis-AT | cis-AT modular |            | cis-AT iterative |      |              | trans-AT |          |                 |
|                     |                 |              |        |          |             | Angl-I   | Angl-II | Anth-I | Isochrom | Polyphen |           |        | Unclass        | cisloading | cisHybridKS      | Ened | iPKSaromatic | PTM      | trans-AT | trans-hybridKS0 |
| <i>S. arenicola</i> | CNS243          | 50           | 2      |          | 2           |          |         |        |          | 2        |           |        | 36             | 2          | 1                | 2    | 2            | 1        |          |                 |
| <i>S. arenicola</i> | CNS296          | 39           | 2      |          | 2           |          |         |        |          | 2        |           |        | 24             | 2          | 2                | 2    | 2            | 1        |          |                 |
| <i>S. arenicola</i> | CNS299          | 35           | 2      |          | 2           |          |         |        |          | 2        |           |        | 22             | 2          | 1                | 2    | 2            |          |          |                 |
| <i>S. arenicola</i> | CNS325          | 35           | 2      |          | 2           |          |         |        |          | 2        | 2         |        | 19             | 2          | 2                | 2    | 2            |          |          |                 |
| <i>S. arenicola</i> | CNS342          | 32           | 2      |          | 2           |          |         |        |          | 2        |           |        | 20             | 1          | 1                | 2    | 2            |          |          |                 |
| <i>S. arenicola</i> | CNS673          | 28           | 2      |          | 2           |          |         |        |          | 2        |           |        | 15             |            | 3                | 2    | 2            |          |          |                 |
| <i>S. arenicola</i> | CNS744          | 27           | 2      |          | 2           |          |         |        |          | 4        |           |        | 12             |            | 2                | 2    | 2            | 1        |          |                 |
| <i>S. arenicola</i> | CNS820          | 34           | 2      |          | 2           |          |         |        |          | 2        |           |        | 20             | 1          | 2                | 2    | 2            | 1        |          |                 |
| <i>S. arenicola</i> | CNS848          | 38           | 3      |          | 4           |          |         |        |          | 2        |           |        | 20             | 3          | 3                | 2    | 1            |          |          |                 |
| <i>S. arenicola</i> | CNT005          | 28           | 2      |          | 2           |          |         |        |          | 2        |           |        | 16             | 1          | 1                | 2    | 2            |          |          |                 |
| <i>S. arenicola</i> | CNT798          | 28           | 3      |          | 4           |          |         |        |          | 2        |           |        | 14             |            | 2                | 2    | 1            |          |          |                 |
| <i>S. arenicola</i> | CNT799          | 34           | 3      |          | 4           |          |         |        |          | 2        |           |        | 19             | 1          | 2                | 2    | 1            |          |          |                 |
| <i>S. arenicola</i> | CNT800          | 30           | 3      |          | 4           |          |         |        |          | 2        |           |        | 16             |            | 2                | 2    | 1            |          |          |                 |
| <i>S. arenicola</i> | CNT849          | 29           | 3      |          | 4           |          |         |        |          | 2        |           |        | 15             |            | 2                | 2    | 1            |          |          |                 |
| <i>S. arenicola</i> | CNT850          | 27           | 3      |          | 4           |          |         |        |          | 2        |           |        | 13             |            | 2                | 2    | 1            |          |          |                 |
| <i>S. arenicola</i> | CNT857          | 30           | 3      |          | 4           |          |         |        |          | 2        |           |        | 16             |            | 2                | 2    | 1            |          |          |                 |
| <i>S. arenicola</i> | CNT859          | 29           | 3      |          | 4           |          |         |        |          | 2        |           |        | 16             |            | 1                | 2    | 1            |          |          |                 |
| <i>S. arenicola</i> | CNX481          | 20           | 2      |          | 2           |          |         |        |          | 2        |           |        | 8              |            | 1                | 2    | 2            | 1        |          |                 |
| <i>S. arenicola</i> | CNX482          | 19           | 2      |          | 2           |          |         |        |          | 2        |           |        | 7              |            | 1                | 2    | 2            | 1        |          |                 |
| <i>S. arenicola</i> | CNX508          | 28           | 2      |          | 2           |          |         |        |          | 2        |           |        | 16             |            | 1                | 2    | 2            | 1        |          |                 |
| <i>S. arenicola</i> | CNX814          | 21           | 2      |          | 2           |          |         | 2      |          | 2        |           |        | 7              |            | 1                | 2    | 2            | 1        |          |                 |
| <i>S. arenicola</i> | CNX891          | 20           | 2      |          | 2           |          |         | 2      |          | 2        |           |        | 6              |            | 1                | 2    | 2            | 1        |          |                 |
| <i>S. arenicola</i> | CNY011          | 30           | 3      |          | 4           |          |         |        |          | 2        |           |        | 16             |            | 2                | 2    | 1            |          |          |                 |
| <i>S. arenicola</i> | CNY230          | 40           | 2      |          | 6           |          |         |        |          | 2        |           |        | 22             | 2          | 2                | 2    | 2            |          |          |                 |
| <i>S. arenicola</i> | CNY231          | 30           | 2      |          | 2           |          |         |        |          | 2        |           |        | 18             | 1          | 1                | 2    | 2            |          |          |                 |
| <i>S. arenicola</i> | CNY234          | 25           | 2      |          | 2           |          |         |        |          | 2        |           |        | 14             |            | 1                | 2    | 2            |          |          |                 |
| <i>S. arenicola</i> | CNY237          | 25           | 2      |          | 2           |          |         |        |          | 2        |           |        | 13             |            | 1                | 2    | 2            | 1        |          |                 |
| <i>S. arenicola</i> | CNY244          | 32           | 2      |          | 2           |          |         |        |          | 2        |           |        | 19             | 1          | 1                | 2    | 2            | 1        |          |                 |
| <i>S. arenicola</i> | CNY256          | 23           | 2      |          | 2           |          |         |        |          | 2        |           |        | 12             |            | 1                | 2    | 2            |          |          |                 |
| <i>S. arenicola</i> | CNY260          | 27           | 2      |          | 2           |          |         |        |          | 2        |           |        | 15             |            | 1                | 2    | 2            | 1        |          |                 |
| <i>S. arenicola</i> | CNY280          | 40           | 3      |          | 8           |          |         |        |          | 2        |           |        | 19             | 2          | 3                | 2    | 1            |          |          |                 |
| <i>S. arenicola</i> | CNY282          | 23           | 2      |          | 2           |          |         |        |          | 2        |           |        | 12             |            | 1                | 2    | 2            |          |          |                 |
| <i>S. arenicola</i> | CNY486          | 24           | 2      |          | 2           |          |         |        |          | 2        |           |        | 13             | 1          |                  | 2    | 2            |          |          |                 |
| <i>S. arenicola</i> | CNY679          | 36           | 3      |          | 4           |          |         |        |          | 2        |           |        | 21             | 1          | 2                | 2    | 1            |          |          |                 |
| <i>S. arenicola</i> | CNY685          | 31           | 2      |          | 2           |          |         |        |          | 2        |           |        | 19             | 1          | 1                | 2    | 2            |          |          |                 |
| <i>S. arenicola</i> | CNY690          | 30           | 2      |          | 2           |          |         |        |          | 2        |           |        | 18             | 1          | 1                | 2    | 2            |          |          |                 |
| <i>S. arenicola</i> | CNY694          | 30           | 2      |          | 2           |          |         |        |          | 2        |           |        | 18             | 1          | 1                | 2    | 2            |          |          |                 |
| <i>S. arenicola</i> | CNS991_DSM45545 | 40           | 3      |          | 4           |          |         |        |          | 2        |           |        | 24             | 2          | 2                | 2    | 1            |          |          |                 |
| <i>total</i>        |                 | 3103         | 313    | 2        | 295         | 12       | 84      | 10     | 10       | 242      | 2         | 5      | 1490           | 92         | 200              | 186  | 104          | 18       | 36       | 2               |

**Table S6. KS domains identified in 27 fungal genomes by NaPDoS2.** Table lists the total number of KSs detected using default settings (e-value cutoff 1e-8 and 200aa minimum alignment length) and their class and subclass distributions. The summed total number of KSs found in each genome is listed as “Total NP2”. The number of protein sequences in each analyzed genome file is listed as “# protein seq”.

Abbreviations: bfFASI= type I FAS Bacterial-Fungal-type; FASII= type II FAS; *cis*-AT= type I modular *cis*-AT; cisHybridKS= type I modular *cis*-AT hybrid KS; PR= type I iterative *cis*-AT partially reducing; NR= type I iterative *cis*-AT non-reducing; HR= type I iterative *cis*-AT highly reducing.

Table S6.

| Fungal genome                                    | # protein seq | Total NP2 | bfFASI | FASII | Type I PKS     |             |                  |    |    |
|--------------------------------------------------|---------------|-----------|--------|-------|----------------|-------------|------------------|----|----|
|                                                  |               |           |        |       | cis-AT modular |             | cis-AT iterative |    |    |
|                                                  |               |           |        |       | cis-AT         | cisHybridKS | PR               | NR | HR |
| <i>Aspergillus niger</i> ATCC 1015               | 12,885        | 50        | 5      | 1     | 1              | -           | 1                | 8  | 34 |
| <i>Aspergillus sergii</i> CBS 130017             | 13,713        | 39        | 5      | 1     | -              | -           | 1                | 12 | 20 |
| <i>Aspergillus nidulans</i> FGSC A4              | 9,556         | 37        | 5      | 1     | 1              | -           | -                | 14 | 16 |
| <i>Penicillium rolfii</i> F1880                  | 9,955         | 26        | 2      | 1     | -              | -           | -                | 6  | 17 |
| <i>Penicillium rubens</i> Wisconsin 54-1255      | 12,791        | 25        | 2      | 1     | -              | -           | 2                | 3  | 17 |
| <i>Sclerotinia sclerotiorum</i> 1980 UF-70       | 14,490        | 20        | 1      | 1     | -              | -           | -                | 4  | 14 |
| <i>Leptosphaeria maculans</i> JN3                | 12,469        | 17        | 2      | 1     | -              | -           | -                | 4  | 10 |
| <i>Nectria haematococca</i> MPVI isolate 77-13-4 | 15,708        | 15        | 1      | 1     | -              | -           | -                | 2  | 11 |
| <i>Alternaria alternata</i> SRC1IrK2f            | 13,466        | 14        | 1      | 1     | -              | 1           | -                | 3  | 8  |
| <i>Zymoseptoria tritici</i> IPO323               | 10,941        | 14        | 1      | 1     | -              | -           | -                | 2  | 10 |
| <i>Neurospora crassa</i> OR74A                   | 10,812        | 11        | 2      | 1     | -              | -           | -                | 1  | 7  |
| <i>Arthrobotrys oligospora</i> TWF154            | 13,042        | 9         | 1      | 1     | -              | -           | 1                | -  | 6  |
| <i>Ustilago maydis</i> 521                       | 6,782         | 5         | 2      | -     | -              | -           | -                | 3  | -  |
| <i>Allomyces macrogynus</i> ATCC 38327           | 19,447        | 4         | 2      | 2     | -              | -           | -                | -  | -  |
| <i>Laccaria bicolor</i> S238N-H82                | 18,215        | 3         | 1      | -     | 1              | -           | -                | 1  | -  |
| <i>Mucor circinelloides</i> 1006PhL              | 12,227        | 3         | 2      | 1     | -              | -           | -                | -  | -  |
| <i>Coprinopsis cinerea</i> okayama 7#130 CC3     | 13,356        | 2         | 1      | -     | -              | -           | -                | 1  | -  |
| <i>Pyronema omphalodes</i> CBS 100304            | 13,367        | 3         | 1      | 1     | -              | -           | -                | 1  | -  |
| <i>Schizophyllum commune</i> H4-8                | 13,193        | 3         | 2      | -     | -              | -           | -                | 1  | -  |
| <i>Batrachochytrium dendrobatidis</i> JAM81      | 8,677         | 2         | 1      | 1     | -              | -           | -                | -  | -  |
| <i>Debaryomyces hansenii</i> CBS767              | 6,286         | 2         | 1      | 1     | -              | -           | -                | -  | -  |
| <i>Neolelecta irregularis</i> DAH-3              | 5,579         | 2         | 1      | 1     | -              | -           | -                | -  | -  |
| <i>Puccinia graminis tritici</i> CRL 75-36-700-3 | 15,979        | 2         | 2      | -     | -              | -           | -                | -  | -  |
| <i>Saccharomyces cerevisiae</i> S288C            | 6,002         | 2         | 1      | 1     | -              | -           | -                | -  | -  |
| <i>Saitoella complicata</i> NRRL Y-17804         | 7,023         | 2         | 1      | 1     | -              | -           | -                | -  | -  |
| <i>Schizosaccharomyces pombe</i> 972h-           | 5,132         | 2         | 1      | 1     | -              | -           | -                | -  | -  |
| <i>Malassezia globosa</i> CBS 7966               | 4,286         | 1         | -      | -     | 1              | -           | -                | -  | -  |

**Table S7. KS detection using NaPDoS versions 1 and 2.**

MiBiG Fungal PKS: NaPDoS2 detected all of the KS domains in 159 MiBiG 2.0<sup>5</sup> fungal PKS BGCs. NaPDoS version 1 and 2 analyses were run with the default settings.

Wawrik 2005 KS clones: While both NaPDoS versions 1 and 2 detected all 147 type II KS amplicons from Wawrik *et al.* 2005<sup>18</sup>, NaPDoS2 could further delineate these sequences into three subclasses. NaPDoS version 1 and 2 analyses were run with the following settings: NaPDoS version 1: HMM 1e-5, 200aa minimum alignment length, pathway assignment: e-value cutoff of 1e-5; NaPDoS2: e-value cutoff 1e-8 and 50aa minimum alignment length. The summed total number of KSs found in each genome is listed as “Total NP1” and “Total NP2” for NaPDoS versions 1 and 2, respectively.

Abbreviations: Iter= Iterative type I; FA= fatty acid synthase; bfFAS= type I FAS Bacterial-Fungal-type; *cis*-AT= type I modular *cis*-AT; PR= type I iterative *cis*-AT partially reducing; NR= type I iterative *cis*-AT non-reducing; HR= type I iterative *cis*-AT highly reducing; Aro-KS $\alpha$ = type II aromatic unclassified KS $\alpha$ ; Angl-I-KS $\alpha$ = type II aromatic angucycline-derived I KS $\alpha$ ; Polyphen-KS $\alpha$ = type II aromatic pentangular polyphenol-derived KS $\alpha$ .

**Table S7.**

| Sequence collection              | NaPDoS1   |         |      |    | NaPDoS2   |        | Type I PKS     |    |                  |    | Type II PKS     |                    |                      |
|----------------------------------|-----------|---------|------|----|-----------|--------|----------------|----|------------------|----|-----------------|--------------------|----------------------|
|                                  | Total NP1 | Type II | Iter | FA | Total NP2 | bfFASI | cis-AT modular |    | cis-AT iterative |    | Aromatic        |                    |                      |
|                                  |           |         |      |    |           |        | cis-AT         | PR | NR               | HR | Aro-KS $\alpha$ | Angl-I-KS $\alpha$ | Polyphen-KS $\alpha$ |
| MiBiG Fungal PKS (159 BGCs)      | 14        | -       | 7    | 7  | 182       | 10     | 4              | 7  | 71               | 90 | -               | -                  | -                    |
| Wawrik 2005 KS clones (147 seqs) | 147       | 147     | -    | -  | 147       | -      | -              | -  | -                | -  | 1               | 45                 | 101                  |



**Table S8. NaPDoS2 analysis of the *Elysia chlorotica* genome.** NaPDoS2 identified nine KSs from the *Elysia chlorotica* CDSs (fna), protein (faa), and translated CDSs (faa) genomes<sup>19</sup>. Highlighted KSs were identified in Torres *et al.* 2020<sup>20</sup> as being associated with new FAS-like animal PKSs (EcPKS1, EcPKS2) and an FAS (EcFAS). The analyses were run with NaPDoS2 default settings (e-value cutoff 1e-8 and 200aa minimum alignment length).

**Table S8.**

| Match         | Query ID   | Database match ID                 | % ID | Align length | E-value  | BGC Match                        | Domain Class | Domain Subclass |
|---------------|------------|-----------------------------------|------|--------------|----------|----------------------------------|--------------|-----------------|
| <b>EcFAS</b>  | RUS90834.1 | OryziasFAS_KS01_MetazoaFASI       | 60   | 403          | 5.7e-152 | Oryzias latipes FAS              | type I FAS   | Metazoan-type   |
| <b>EcPKS1</b> | RUS71288.1 | HomoFAS_KS01_MetazoaFASI          | 52   | 406          | 9.6e-119 | Homo sapiens FAS                 | type I FAS   | Metazoan-type   |
|               | RUS77019.1 | OryziasFAS_KS01_MetazoaFASI       | 49   | 403          | 2.7e-117 | Oryzias latipes FAS              | type I FAS   | Metazoan-type   |
| <b>EcPKS2</b> | RUS75294.1 | OryziasFAS_KS01_MetazoaFASI       | 49   | 403          | 4.7e-117 | Oryzias latipes FAS              | type I FAS   | Metazoan-type   |
|               | RUS92164.1 | MelopsittacusFAS_KS01_MetazoaFASI | 39   | 410          | 2.9e-76  | Melopsittacus undulatus FAS      | type I FAS   | Metazoan-type   |
|               | RUS75295.1 | OryziasFAS_KS01_MetazoaFASI       | 45   | 308          | 6.3e-73  | Oryzias latipes FAS              | type I FAS   | Metazoan-type   |
|               | RUS68442.1 | AliivibrioAPE_KS03_FASII          | 60   | 407          | 1.3e-137 | Aliivibrio fischeri aryl polyene | type II FAS  | no subclass     |
|               | RUS69056.1 | EscherichiaFAS_KS02_FASII         | 57   | 420          | 1.9e-136 | Escherichia coli FAS             | type II FAS  | no subclass     |
|               | RUS77541.1 | EscherichiaFAS_KS02_FASII         | 47   | 421          | 4.8e-103 | Escherichia coli FAS             | type II FAS  | no subclass     |

**Table S9. Moorea sediment metagenomes analyzed with NaPDoS2.** KS domains from 20 marine sediment metagenomes<sup>21</sup> were assigned to 26 different subclasses. NaPDoS2 analyses were run with default settings (e-value cutoff 1e-8 and 200aa minimum alignment length). KS $\alpha$  and KS $\beta$  sequences are grouped together.

Abbreviations: MetazoaFASI= type I FAS Metazoan-type; ProtistFASI= type I FAS Protist-type; FASII= type II FAS no subclass; Betabranh= type II beta-branching cassettes; Polyene= type II polyenes; Ape= type II aryl polyenes; Aro= type II aromatic unclassified; Angl= type II aromatic angucycline-derived I & II; Tetcyc= type II aromatic tetracycline-derived; Anth= type II aromatic anthracycline-derived I & II; Isochrom= type II aromatic isochromanequinone-derived; Tetcen= type II aromatic tetracenomycin-derived; Polyphen= type II aromatic pentangular polyphenol-derived; SPKS= type II aromatic spore pigment; *cis*-AT= type I modular *cis*-AT; cisloading= type I modular *cis*-AT loading module; cisHybridKS= type I modular *cis*-AT hybrid KS; cisOLS= type I modular *cis*-AT olefin synthase; cistandemECH= type I modular *cis*-AT tandem ECH; iPKS= type I iterative *cis*-AT no subclass; iPKSPUFA= type I iterative *cis*-AT PUFA (polyunsaturated fatty acids); Ened= type I iterative *cis*-AT enediynes; iPKSaromatic= type I iterative *cis*-AT aromatic; PTM= type I iterative *cis*-AT PTM-type (polycyclic tetramate macrolactam); HR= type I iterative *cis*-AT highly reducing; *trans*-AT= type I *trans*-AT no subclass; *trans*-hybridKS= type I *trans*-AT hybrid KS; *trans*-hybridKS0= type I *trans*-AT hybrid KS0 (non-elongating KS).

**Table S9.**

| Metagenome | # contigs | N50   | Total NP2 | Type II PKS |             |       |            |          |         |     |     |      |        |      |          |        |          |      |        | Type I PKS     |             |        |              |      |                  |      |              |     |    |          |                |                 |
|------------|-----------|-------|-----------|-------------|-------------|-------|------------|----------|---------|-----|-----|------|--------|------|----------|--------|----------|------|--------|----------------|-------------|--------|--------------|------|------------------|------|--------------|-----|----|----------|----------------|-----------------|
|            |           |       |           | FAS I       |             |       | Aromatic   |          |         |     |     |      |        |      |          |        |          |      |        | cis-AT modular |             |        |              |      | cis-AT iterative |      |              |     |    | trans-AT |                |                 |
|            |           |       |           | MetazoaFASI | ProtistFASI | FASII | MetazoaPKS | Betabran | Polyene | Ape | Aro | Angl | Tetcyc | Anth | Isochrom | Tetcen | Polyphen | SPKS | cis-AT | cisloading     | cisHybridKS | cisOLS | cistandemECH | iPKS | iPKSPUFA         | Ened | iPKSaromatic | PTM | HR | trans-AT | trans-hybridKS | trans-hybridKS0 |
| MO18_007   | 152,894   | 5,918 | 145       | -           | -           | 61    | -          | -        | 5       | 3   | 1   | 5    | -      | -    | -        | -      | -        | 19   | 3      | 5              | 1           | -      | 1            | 34   | -                | -    | -            | -   | 7  | -        | -              |                 |
| MO18_010   | 184,034   | 3,212 | 150       | -           | -           | 54    | -          | 1        | 4       | 5   | 2   | 2    | -      | 1    | 1        | 1      | -        | 17   | 1      | 14             | -           | -      | 3            | 34   | 1                | -    | -            | -   | 9  | -        | -              |                 |
| MO18_039   | 336,958   | 1,769 | 58        | -           | -           | 13    | 4          | -        | 1       | 1   | -   | 1    | -      | -    | -        | 1      | -        | 8    | -      | 17             | -           | -      | -            | 3    | 1                | -    | -            | 8   | -  | -        |                |                 |
| MO18_042   | 378,383   | 1,596 | 121       | -           | -           | 60    | -          | 1        | 1       | 5   | 1   | 2    | -      | -    | -        | -      | -        | 13   | 3      | 3              | 2           | -      | 2            | 22   | -                | -    | 1            | -   | 5  | -        | -              |                 |
| MO18_071   | 37,150    | 2,093 | 87        | -           | 1           | 23    | -          | -        | -       | 2   | -   | 1    | -      | -    | -        | -      | -        | 24   | -      | 9              | 3           | -      | -            | 5    | -                | -    | 1            | -   | 16 | -        | 1              |                 |
| MO18_074   | 211,343   | 2,041 | 312       | -           | -           | 149   | 1          | -        | 5       | 8   | 6   | 6    | -      | -    | -        | 1      | 4        | 1    | 41     | 1              | 28          | 3      | -            | 8    | 39               | 4    | -            | -   | 1  | 6        | -              | -               |
| MO18_103   | 186,468   | 1,851 | 269       | -           | 1           | 114   | -          | 1        | 6       | 13  | 3   | 1    | -      | -    | 1        | 1      | 6        | -    | 34     | 3              | 15          | 3      | 1            | 4    | 46               | 3    | -            | -   | -  | 13       | -              | -               |
| MO18_106   | 440,441   | 1,847 | 48        | -           | -           | 12    | -          | -        | -       | -   | -   | -    | -      | -    | -        | -      | -        | 19   | 1      | -              | 6           | -      | -            | 7    | -                | -    | -            | -   | 3  | -        | -              |                 |
| MO18_135   | 230,831   | 2,120 | 270       | -           | 1           | 91    | -          | 4        | 1       | 5   | 4   | 5    | 1      | 1    | -        | -      | 2        | -    | 34     | 2              | 35          | 6      | 3            | 2    | 32               | 6    | -            | -   | -  | 35       | -              | -               |
| MO18_138   | 104       | 1,300 | 0         | -           | -           | -     | -          | -        | -       | -   | -   | -    | -      | -    | -        | -      | -        | -    | -      | -              | -           | -      | -            | -    | -                | -    | -            | -   | -  | -        | -              | -               |
| MO18_167   | 311,846   | 2,402 | 706       | -           | -           | 272   | -          | 7        | 5       | 21  | 12  | 13   | -      | 4    | 1        | 1      | 8        | 1    | 83     | 11             | 48          | 18     | 3            | 8    | 129              | 18   | 2            | 1   | -  | 39       | 1              | -               |
| MO18_170   | 234,614   | 1,716 | 336       | -           | -           | 192   | -          | 1        | 5       | 20  | 6   | 7    | -      | 1    | 1        | 2      | 2        | -    | 16     | 1              | 8           | 2      | -            | 3    | 60               | 6    | -            | 1   | -  | 2        | -              | -               |
| MO18_180   | 182,647   | 1,599 | 227       | -           | -           | 125   | -          | 1        | 5       | 12  | -   | 4    | -      | -    | 1        | -      | 3        | -    | 13     | 1              | 10          | 4      | 1            | 5    | 29               | 3    | -            | -   | -  | 10       | -              | -               |
| MO18_184   | 309,098   | 3,457 | 51        | -           | -           | 11    | -          | 1        | -       | 3   | 1   | 1    | -      | -    | -        | -      | 1        | -    | 17     | 1              | -           | 5      | -            | -    | 5                | -    | -            | -   | 5  | -        | -              |                 |
| MO18_188   | 259,773   | 2,959 | 505       | -           | -           | 188   | 1          | 5        | 5       | 9   | 4   | 10   | 1      | -    | -        | -      | 7        | -    | 106    | 4              | 41          | 20     | 3            | 7    | 53               | 8    | 1            | 1   | -  | 30       | 1              | -               |
| MO18_192   | 241,995   | 1,727 | 341       | -           | -           | 116   | 2          | 4        | 8       | 8   | 2   | 5    | -      | 3    | -        | -      | 4        | -    | 60     | 3              | 34          | 10     | 2            | 3    | 49               | 8    | -            | -   | -  | 20       | -              | -               |
| MO18_199   | 229,239   | 2,042 | 200       | 3           | -           | 77    | -          | 4        | 2       | 3   | 1   | 2    | -      | 1    | 1        | -      | 2        | -    | 46     | 3              | 2           | 1      | 4            | 3    | 31               | 2    | -            | -   | -  | 12       | -              | -               |
| MO18_202   | 242,491   | 2,136 | 280       | -           | 1           | 122   | -          | 2        | 5       | 10  | 5   | 8    | -      | -    | -        | 1      | 3        | -    | 41     | 3              | 14          | 2      | 3            | 3    | 48               | 2    | -            | -   | -  | 7        | -              | -               |
| MO18_231   | 110,677   | 2,357 | 91        | -           | -           | 30    | -          | 1        | -       | 5   | -   | 2    | -      | -    | -        | -      | 1        | -    | 22     | 1              | 2           | -      | -            | 20   | 1                | -    | -            | -   | 5  | -        | -              |                 |
| MO18_234   | 182,155   | 2,286 | 170       | -           | 3           | 62    | -          | 2        | -       | -   | 2   | 4    | -      | -    | -        | -      | -        | 37   | -      | 13             | 6           | 1      | 1            | 20   | 2                | -    | -            | -   | 16 | 1        | -              |                 |

**Table S10. NaPDoS2 analysis of KS amplicon eSNaPD v2.0 data.** NaPDoS2 detected and classified all 381 sequences from a New Mexico desert soil KS amplicon library (NM\_KS\_ARRAY\_LIB01, Owen *et al.* 2013 PNAS<sup>22</sup>). Additionally, NaPDoS2 classified all but one group of the 756 uncharacterized “Novel Clusters 1-60” from the same eSNaPD v2.0 soil amplicon library. NaPDoS2 settings: e-value cutoff 1e-8 and 50aa minimum alignment length (due to the amplicon sequence length). The “% ID” column lists the percent of sequences that were classified by NaPDoS2 (i.e. “Total NP2”/“# seq”; color scale of light grey (low % ID) to dark grey (high % ID)).

Abbreviations: *cis*-AT= type I modular *cis*-AT; *cis*loading= type I modular *cis*-AT loading module; *cis*HybridKS= type I modular *cis*-AT hybrid KS; *cis*OLS= type I modular *cis*-AT olefin synthase; *cis*tandemECH= type I modular *cis*-AT tandem ECH; *iPKS*aromatic= type I iterative *cis*-AT aromatic; PTM= type I iterative *cis*-AT PTM-type (polycyclic tetramate macrolactam); NR= type I iterative *cis*-AT non-reducing; HR= type I iterative *cis*-AT highly reducing; *trans*-AT= type I *trans*-AT no subclass; *trans*-hybridKS= type I *trans*-AT hybrid KS.

Table S10.

| % ID | Sequence set      | # seq | Total NP2 | Type I PKS     |            |             |        |              |                  |     |    |     |          |                |   |
|------|-------------------|-------|-----------|----------------|------------|-------------|--------|--------------|------------------|-----|----|-----|----------|----------------|---|
|      |                   |       |           | cis-AT modular |            |             |        |              | cis-AT iterative |     |    |     | trans-AT |                |   |
|      |                   |       |           | cis-AT         | cisloading | cisHybridKS | cisOLS | cistandemECH | iPKSaromatic     | PTM | NR | HR  | trans-AT | trans-hybridKS |   |
| 102% | NM_KS_ARRAY_LIB01 | 381   | 388       | 310            | 7          | 15          | 2      | -            | -                | 5   | 13 | -   | -        | 36             | - |
| 99%  | NovClst1          | 192   | 191       | 2              | -          | -           | -      | -            | -                | -   | -  | 189 | -        | -              | - |
| 100% | NovClst2          | 42    | 42        | 4              | 15         | -           | 15     | -            | -                | -   | 4  | -   | 4        | -              | - |
| 100% | NovClst3          | 38    | 38        | 3              | -          | -           | -      | -            | -                | -   | 35 | -   | -        | -              | - |
| 94%  | NovClst4          | 31    | 29        | -              | -          | -           | -      | -            | -                | -   | -  | -   | -        | 29             | - |
| 79%  | NovClst5          | 29    | 23        | -              | -          | 22          | -      | -            | -                | -   | -  | -   | -        | -              | 1 |
| 108% | NovClst6          | 25    | 27        | -              | -          | -           | -      | -            | -                | -   | -  | 27  | -        | -              | - |
| 100% | NovClst7          | 22    | 22        | -              | -          | 22          | -      | -            | -                | -   | -  | -   | -        | -              | - |
| 112% | NovClst8          | 17    | 19        | -              | -          | 18          | -      | -            | -                | -   | -  | -   | -        | -              | 1 |
| 86%  | NovClst9          | 14    | 12        | -              | -          | 11          | -      | -            | -                | -   | -  | -   | -        | -              | 1 |
| 92%  | NovClst10         | 12    | 11        | 8              | -          | -           | -      | -            | -                | -   | -  | -   | -        | 3              | - |
| 100% | NovClst11         | 12    | 12        | 6              | -          | -           | -      | -            | -                | -   | -  | -   | -        | 6              | - |
| 100% | NovClst12         | 12    | 12        | -              | -          | -           | -      | -            | -                | -   | 12 | -   | -        | -              | - |
| 92%  | NovClst13         | 12    | 11        | -              | -          | 11          | -      | -            | -                | -   | -  | -   | -        | -              | - |
| 110% | NovClst14         | 10    | 11        | 4              | -          | -           | 3      | -            | -                | -   | -  | -   | -        | 4              | - |
| 100% | NovClst15         | 10    | 10        | -              | -          | -           | 10     | -            | -                | -   | -  | -   | -        | -              | - |
| 100% | NovClst16         | 9     | 9         | -              | -          | 9           | -      | -            | -                | -   | -  | -   | -        | -              | - |
| 89%  | NovClst17         | 9     | 8         | 7              | -          | -           | 1      | -            | -                | -   | -  | -   | -        | -              | - |
| 111% | NovClst18         | 9     | 10        | 10             | -          | -           | -      | -            | -                | -   | -  | -   | -        | -              | - |
| 78%  | NovClst19         | 9     | 7         | 5              | -          | -           | -      | 1            | -                | -   | -  | -   | -        | 1              | - |
| 89%  | NovClst20         | 9     | 8         | -              | -          | 7           | -      | -            | -                | -   | -  | -   | -        | -              | 1 |
| 89%  | NovClst21         | 9     | 8         | 8              | -          | -           | -      | -            | -                | -   | -  | -   | -        | -              | - |
| 100% | NovClst22         | 8     | 8         | 8              | -          | -           | -      | -            | -                | -   | 8  | -   | -        | -              | - |
| 113% | NovClst23         | 8     | 9         | 9              | -          | -           | -      | -            | -                | -   | -  | -   | -        | -              | - |
| 113% | NovClst24         | 8     | 9         | 1              | -          | -           | -      | -            | -                | -   | -  | 8   | -        | -              | - |
| 88%  | NovClst25         | 8     | 7         | -              | -          | -           | -      | -            | -                | -   | -  | -   | -        | 7              | - |
| 100% | NovClst26         | 8     | 8         | -              | -          | 8           | -      | -            | -                | -   | -  | -   | -        | -              | - |
| 100% | NovClst27         | 8     | 8         | 8              | -          | -           | -      | -            | -                | -   | -  | -   | -        | -              | - |
| 114% | NovClst28         | 7     | 8         | -              | -          | -           | -      | -            | -                | -   | 8  | -   | -        | -              | - |
| 86%  | NovClst29         | 7     | 6         | -              | -          | 6           | -      | -            | -                | -   | -  | -   | -        | -              | - |
| 100% | NovClst30         | 7     | 7         | -              | -          | 7           | -      | -            | -                | -   | -  | -   | -        | -              | - |
| 100% | NovClst31         | 7     | 7         | 4              | -          | -           | 3      | -            | -                | -   | -  | -   | -        | -              | - |
| 100% | NovClst32         | 7     | 7         | -              | -          | 7           | -      | -            | -                | -   | -  | -   | -        | -              | - |
| 86%  | NovClst33         | 7     | 6         | -              | -          | -           | -      | -            | -                | -   | -  | -   | -        | 6              | - |
| 100% | NovClst34         | 7     | 7         | -              | -          | 7           | -      | -            | -                | -   | -  | -   | -        | -              | - |
| 100% | NovClst35         | 6     | 6         | 1              | 1          | -           | -      | -            | -                | -   | -  | -   | -        | 4              | - |
| 67%  | NovClst36         | 6     | 4         | -              | -          | -           | -      | -            | -                | -   | -  | -   | -        | 4              | - |
| 100% | NovClst37         | 6     | 6         | -              | -          | 6           | -      | -            | -                | -   | -  | -   | -        | -              | - |
| 83%  | NovClst38         | 6     | 5         | -              | -          | 5           | -      | -            | -                | -   | -  | -   | -        | -              | - |
| 100% | NovClst39         | 6     | 6         | 6              | -          | -           | -      | -            | -                | -   | -  | -   | -        | -              | - |
| 67%  | NovClst40         | 6     | 4         | -              | -          | 4           | -      | -            | -                | -   | -  | -   | -        | -              | - |
| 100% | NovClst41         | 6     | 6         | 6              | -          | -           | -      | -            | -                | -   | -  | -   | -        | -              | - |
| 0%   | NovClst42         | 6     | 0         | -              | -          | -           | -      | -            | -                | -   | -  | -   | -        | -              | - |
| 100% | NovClst43         | 6     | 6         | 1              | -          | -           | 5      | -            | -                | -   | -  | -   | -        | -              | - |
| 100% | NovClst44         | 5     | 5         | -              | -          | -           | -      | -            | -                | -   | -  | -   | -        | 5              | - |
| 100% | NovClst45         | 5     | 5         | -              | -          | 5           | -      | -            | -                | -   | -  | -   | -        | -              | - |
| 100% | NovClst46         | 5     | 5         | 5              | -          | -           | -      | -            | -                | -   | -  | -   | -        | -              | - |
| 140% | NovClst47         | 5     | 7         | 2              | -          | -           | 4      | -            | -                | -   | -  | -   | 1        | -              | - |
| 60%  | NovClst48         | 5     | 3         | -              | -          | -           | -      | -            | -                | -   | -  | -   | -        | 3              | - |
| 100% | NovClst49         | 4     | 4         | -              | -          | 4           | -      | -            | -                | -   | -  | -   | -        | -              | - |
| 100% | NovClst50         | 4     | 4         | -              | -          | 4           | -      | -            | -                | -   | -  | -   | -        | -              | - |
| 100% | NovClst51         | 4     | 4         | -              | -          | 4           | -      | -            | -                | -   | -  | -   | -        | -              | - |
| 100% | NovClst52         | 4     | 4         | -              | -          | -           | -      | -            | -                | -   | -  | -   | -        | 4              | - |
| 25%  | NovClst53         | 4     | 1         | 1              | -          | -           | -      | -            | -                | -   | -  | -   | -        | -              | - |
| 100% | NovClst54         | 4     | 4         | 4              | -          | -           | -      | -            | -                | -   | -  | -   | -        | -              | - |
| 100% | NovClst55         | 4     | 4         | -              | -          | 4           | -      | -            | -                | -   | -  | -   | -        | -              | - |
| 100% | NovClst56         | 4     | 4         | -              | -          | -           | -      | -            | -                | -   | -  | -   | -        | 4              | - |
| 100% | NovClst57         | 4     | 4         | -              | -          | 4           | -      | -            | -                | -   | -  | -   | -        | -              | - |
| 75%  | NovClst58         | 4     | 3         | 3              | -          | -           | -      | -            | -                | -   | -  | -   | -        | -              | - |
| 75%  | NovClst59         | 4     | 3         | -              | -          | 3           | -      | -            | -                | -   | -  | -   | -        | -              | - |
| 175% | NovClst60         | 4     | 7         | -              | -          | -           | -      | -            | -                | -   | 7  | -   | -        | -              | - |

**Table S11. NaPDoS2 analysis of 12 type II KS amplicon datasets from Borsetto *et al.* 2019<sup>23</sup>.** The total number of amplicon sequences not detected by NaPDoS2 represented 36-95% of the sequences in the amplicon libraries (“# seqs”). Of the KS sequences that were detected by NaPDoS2, 19-93% were classified as type II PKSs and could be assigned to a wide range of type II subclasses while the remainder were classified as type II fatty acid synthases (FASII). NaPDoS2 settings: e-value cutoff 1e-8 and 50aa minimum alignment length (due to the amplicon sequence length).

Abbreviations: FASII= type II FAS no subclass; Betabranche= type II beta-branching cassettes; Polyene-KS $\alpha$ = type II polyenes KS $\alpha$ ; Ape-KS $\alpha$ = type II aryl polyenes KS $\alpha$ ; Aro-KS $\alpha$ = type II aromatic unclassified KS $\alpha$ ; Angl-I-KS $\alpha$ = type II aromatic angucycline-derived I KS $\alpha$ ; Angl-II-KS $\alpha$ = type II aromatic angucycline-derived II KS $\alpha$ ; Tetcyc-KS $\alpha$ = type II aromatic tetracycline-derived KS $\alpha$ ; Anth-I-KS $\alpha$ = type II aromatic anthracycline-derived I KS $\alpha$ ; Anth-I-KS $\beta$ = type II aromatic anthracycline-derived I KS $\beta$ ; Anth-II-KS $\alpha$ = type II aromatic anthracycline-derived II KS $\alpha$ ; Isochrom-KS $\alpha$ = type II aromatic isochromanequinone-derived KS $\alpha$ ; Tetcen-KS $\alpha$ = type II aromatic tetracenomycin-derived KS $\alpha$ ; Tetcen-KS $\beta$ = type II aromatic tetracenomycin-derived KS $\beta$ ; Polyphen-KS $\alpha$ = type II aromatic pentangular polyphenol-derived KS $\alpha$ ; Polyphen-KS $\beta$ = type II aromatic pentangular polyphenol-derived KS $\beta$ ; SPKS-KS $\alpha$ = type II aromatic spore pigment KS $\alpha$ ; *cis*-AT= type I modular *cis*-AT; *cis*HybridKS= type I modular *cis*-AT hybrid KS.

Table S11.

| Dataset        | # seqs  | Total NP2 | FASII  | Type II PKS |                     |                 |                 |                    |                     |                    |                    |                   |                     |                      |                    |                   |                      |                     |                  | Type I PKS |             |
|----------------|---------|-----------|--------|-------------|---------------------|-----------------|-----------------|--------------------|---------------------|--------------------|--------------------|-------------------|---------------------|----------------------|--------------------|-------------------|----------------------|---------------------|------------------|------------|-------------|
|                |         |           |        | Betabran    | Polyene-KS $\alpha$ | Ape-KS $\alpha$ | Aromatic        |                    |                     |                    |                    |                   |                     |                      |                    |                   | cis-AT modular       |                     |                  |            |             |
|                |         |           |        |             |                     |                 | Aro-KS $\alpha$ | Angl-I-KS $\alpha$ | Angl-II-KS $\alpha$ | Tetcyc-KS $\alpha$ | Anth-I-KS $\alpha$ | Anth-I-KS $\beta$ | Anth-II-KS $\alpha$ | Isochrom-KS $\alpha$ | Tetcen-KS $\alpha$ | Tetcen-KS $\beta$ | Polyphen-KS $\alpha$ | Polyphen-KS $\beta$ | SPKS-KS $\alpha$ | cis-AT     | cisHybridKS |
| S31_Antarctica | 34,600  | 12,757    | 9,593  | 6           | 54                  | 2               | 63              | 419                | 163                 | 13                 | 10                 | 1                 | 21                  | 201                  | 75                 | 3                 | 333                  | 20                  | 1,780            | -          | -           |
| S32_Antarctica | 31,118  | 7,905     | 6,414  | 4           | 50                  | 12              | 52              | 369                | 51                  | 13                 | 42                 | 1                 | 11                  | 134                  | 47                 | 1                 | 343                  | 16                  | 344              | 1          | -           |
| S33_Antarctica | 14,703  | 774       | 328    | -           | 8                   | -               | 18              | 264                | 1                   | 1                  | 20                 | -                 | -                   | 31                   | 30                 | 2                 | 18                   | 9                   | 44               | -          | -           |
| S22_AlgeriaB3  | 166,814 | 9,345     | 1,172  | 1           | 177                 | 15              | 1,253           | 1,003              | 37                  | 4                  | 2,573              | -                 | 76                  | 366                  | 461                | -                 | 1,370                | -                   | 836              | 1          | -           |
| S23_AlgeriaB3  | 119,567 | 19,317    | 3,155  | 4           | 429                 | 38              | 836             | 4,648              | 22                  | 39                 | 4,687              | -                 | 106                 | 418                  | 954                | -                 | 1,212                | -                   | 2,768            | 1          | -           |
| S24_AlgeriaB3  | 126,771 | 21,643    | 3,072  | -           | 373                 | 26              | 1,354           | 4,149              | 27                  | 4                  | 6,824              | -                 | 148                 | 414                  | 1,075              | -                 | 2,097                | -                   | 2,080            | -          | -           |
| S28_CubaFir    | 182,418 | 13,220    | 3,605  | -           | 308                 | 17              | 931             | 2,718              | 9                   | 10                 | 1,174              | -                 | 90                  | 851                  | 48                 | -                 | 527                  | -                   | 2,931            | 1          | -           |
| S29_CubaFir    | 194,450 | 18,079    | 2,394  | -           | 146                 | 12              | 1,279           | 7,113              | 8                   | 3                  | 3,331              | -                 | 18                  | 1,174                | 18                 | -                 | 896                  | -                   | 1,687            | -          | -           |
| S30_CubaFir    | 204,614 | 30,393    | 2,701  | -           | 1,056               | 11              | 993             | 7,993              | 6                   | 8                  | 1,822              | -                 | 194                 | 4,820                | 39                 | -                 | 973                  | -                   | 9,768            | 9          | -           |
| S37_Warwick    | 241,475 | 115,324   | 19,560 | 8           | 560                 | 30              | 3,964           | 15,941             | 160                 | 20                 | 6,114              | -                 | 269                 | 38,472               | 38                 | -                 | 8,868                | 17                  | 21,276           | 23         | 4           |
| S38_Warwick    | 110,892 | 58,876    | 7,728  | 4           | 321                 | 22              | 4,390           | 6,556              | 124                 | 1                  | 3,158              | -                 | 269                 | 7,026                | 38                 | -                 | 4,913                | 11                  | 24,312           | 1          | 2           |
| S39_Warwick    | 135,287 | 86,200    | 5,716  | 1           | 118                 | 10              | 2,760           | 12,604             | 344                 | 6                  | 2,936              | -                 | 600                 | 33,933               | 60                 | -                 | 4,122                | 15                  | 22,974           | -          | 1           |



**Table S12. NaPDoS2 analysis of 5,000 randomly selected KS amplicon sequences from the Elfeki *et al.* 2018<sup>15</sup> “Chitin” type I (SRR7206837\_H054B\_Chitin\_KSdomain) and type II (SRR7206805\_H054B\_Chitin\_KSalphadomain) KS datasets run at varying minimum amino acid alignment lengths.** Decreasing the minimum amino acid alignment length increases the number of KSs detected but also increases the likelihood of false positives and misclassifications, as may be evidenced by the detection of type I KSs in the type II dataset. Notably, below an alignment length of 100aa, the number of KSs detected in the type I dataset exceeds the number of sequences analyzed, as can be expected when shorter domain fragment hits are identified from the same longer amplicon sequences.

Table S12.

| Type II KSA: Chitin |                       |                            |          |                | Type I KS: Chitin |                         |                            |          |                |
|---------------------|-----------------------|----------------------------|----------|----------------|-------------------|-------------------------|----------------------------|----------|----------------|
| Alignment Length    | Class                 | Subclass                   | NP2 Hits | Total NP2 hits | Alignment Length  | Class                   | Subclass                   | NP2 Hits | Total NP2 hits |
| <b>200aa</b>        | -                     | -                          | 0        | 0              | <b>200aa</b>      | type I modular cis-AT   | no subclass                | 21       | 23             |
| <b>150aa</b>        | type II aromatic      | pentangularpolyphenolKSa   | 1        | 1              |                   | type I iterative cis-AT | aromatic                   | 2        |                |
| <b>100aa</b>        | type II aromatic      | angucycline I KSa          | 469      | 1,229          | <b>150aa</b>      | type I modular cis-AT   | no subclass                | 385      | 423            |
|                     | type II aromatic      | isochromanequinone KSa     | 225      |                |                   | type I iterative cis-AT | aromatic                   | 24       |                |
|                     | type II aromatic      | pentangular polyphenol KSa | 200      |                |                   | type I trans-AT         | no subclass                | 8        |                |
|                     | type II aromatic      | unclassified KSa           | 146      |                |                   | type I trans-AT         | hybrid KS                  | 6        |                |
|                     | type II aromatic      | tetracenomycin KSa         | 111      |                | <b>100aa</b>      | type I modular cis-AT   | no subclass                | 3,406    | 3,594          |
|                     | type II aromatic      | anthracycline I KSa        | 70       |                |                   | type I trans-AT         | no subclass                | 75       |                |
|                     | type I modular cis-AT | no subclass                | 2        |                |                   | type I iterative cis-AT | aromatic                   | 57       |                |
|                     | type II aromatic      | angucycline II KSa         | 2        |                |                   | type I modular cis-AT   | hybrid KS                  | 39       |                |
|                     | type II aromatic      | spore pigment KSa          | 1        |                |                   | type I trans-AT         | hybrid KS                  | 15       |                |
|                     | type I trans-AT       | hybrid KS                  | 1        |                |                   | type II aromatic        | pentangular polyphenol KSa | 1        |                |
|                     | type I trans-AT       | no subclass                | 1        |                |                   | type II aromatic        | spore pigment KSa          | 1        |                |
|                     | type II aromatic      | anthracycline II KSa       | 1        |                | <b>50aa</b>       | type I modular cis-AT   | no subclass                | 7,441    | 7,768          |
| <b>50aa</b>         | type II aromatic      | angucycline I KSa          | 958      | 2,999          |                   | type I trans-AT         | no subclass                | 139      |                |
|                     | type II aromatic      | pentangular polyphenol KSa | 673      |                |                   | type I modular cis-AT   | hybrid KS                  | 85       |                |
|                     | type II aromatic      | isochromanequinone KSa     | 570      |                |                   | type I iterative cis-AT | aromatic                   | 72       |                |
|                     | type II aromatic      | unclassified KSa           | 378      |                |                   | type I trans-AT         | hybrid KS                  | 17       |                |
|                     | type II aromatic      | tetracenomycin KSa         | 221      |                |                   | type II aromatic        | pentangular polyphenol KSa | 5        |                |
|                     | type II aromatic      | anthracycline I KSa        | 132      |                |                   | type II aromatic        | angucycline I KSa          | 3        |                |
|                     | type II aromatic      | spore pigment KSa          | 31       |                |                   | type II aromatic        | spore pigment KSa          | 2        |                |
|                     | type I modular cis-AT | no subclass                | 20       |                |                   | type II aromatic        | anthracycline I KSa        | 1        |                |
|                     | type II aromatic      | anthracycline II KSa       | 4        |                |                   | type II aromatic        | isochromanequinone KSa     | 1        |                |
|                     | type II aromatic      | tetracycline KSa           | 4        |                |                   | type II aromatic        | tetracenomycin KSa         | 1        |                |
|                     | type II aromatic      | angucycline II KSa         | 4        |                |                   | type II aromatic        | unclassified KSa           | 1        |                |
|                     | type I modular cis-AT | hybrid KS                  | 2        |                | <b>30aa</b>       | type I modular cis-AT   | no subclass                | 7,600    | 7,930          |
|                     | type I trans-AT       | hybrid KS                  | 1        |                |                   | type I trans-AT         | no subclass                | 140      |                |
|                     | type I trans-AT       | no subclass                | 1        |                |                   | type I modular cis-AT   | hybrid KS                  | 86       |                |
| <b>30aa</b>         | type II aromatic      | angucycline I KSa          | 994      | 3,099          |                   | type I iterative cis-AT | aromatic                   | 72       |                |
|                     | type II aromatic      | pentangular polyphenol KSa | 693      |                |                   | type I trans-AT         | hybrid KS                  | 17       |                |
|                     | type II aromatic      | isochromanequinone KSa     | 584      |                |                   | type II aromatic        | pentangular polyphenol KSa | 5        |                |
|                     | type II aromatic      | unclassified KSa           | 381      |                |                   | type II aromatic        | angucycline I KSa          | 3        |                |
|                     | type II aromatic      | tetracenomycin KSa         | 224      |                |                   | type II aromatic        | spore pigment KSa          | 3        |                |
|                     | type II aromatic      | anthracycline I KSa        | 138      |                |                   | type II aromatic        | anthracycline I KSa        | 1        |                |
|                     | type II aromatic      | spore pigment KSa          | 40       |                |                   | type II aromatic        | isochromanequinone KSa     | 1        |                |
|                     | type I modular cis-AT | no subclass                | 22       |                |                   | type II aromatic        | tetracenomycin KSa         | 1        |                |
|                     | type II aromatic      | tetracycline KSa           | 9        |                |                   | type II aromatic        | unclassified KSa           | 1        |                |
|                     | type II aromatic      | anthracycline II KSa       | 5        |                |                   |                         |                            |          |                |
|                     | type II aromatic      | angucycline II KSa         | 5        |                |                   |                         |                            |          |                |
|                     | type I modular cis-AT | hybrid KS                  | 2        |                |                   |                         |                            |          |                |
|                     | type I trans-AT       | hybrid KS                  | 1        |                |                   |                         |                            |          |                |
|                     | type I trans-AT       | no subclass                | 1        |                |                   |                         |                            |          |                |

## References

- (1) Ziemert, N.; Podell, S.; Penn, K.; Badger, J. H.; Allen, E.; Jensen, P. R. The Natural Product Domain Seeker NaPDoS: A Phylogeny Based Bioinformatic Tool to Classify Secondary Metabolite Gene Diversity. *PLoS One* **2012**, *7* (3), e34064. <https://doi.org/10.1371/journal.pone.0034064>.
- (2) Blin, K.; Shaw, S.; Kloosterman, A. M.; Charlop-Powers, Z.; van Wezel, G. P.; Medema, M. H.; Weber, T. AntiSMASH 6.0: Improving Cluster Detection and Comparison Capabilities. *Nucleic Acids Res.* **2021**, 1–7. <https://doi.org/10.1093/nar/gkab335>.
- (3) Helfrich, E. J. N.; Ueoka, R.; Dolev, A.; Rust, M.; Meoded, R. A.; Califano, G.; Costa, R.; Gugger, M.; Steinbeck, C.; Moreno, P.; Piel, J. Automated Structure Prediction of Trans-Acyltransferase Polyketide Synthase Products. *Nat Chem Biol* **2019**, *15* (August). <https://doi.org/10.1038/s41589-019-0313-7>.
- (4) Bachmann, B. O.; Ravel, J. *Chapter 8 Methods for In Silico Prediction of Microbial Polyketide and Nonribosomal Peptide Biosynthetic Pathways from DNA Sequence Data*, 1st ed.; Elsevier Inc., **2009**; Vol. 458. [https://doi.org/10.1016/S0076-6879\(09\)04808-3](https://doi.org/10.1016/S0076-6879(09)04808-3).
- (5) Kautsar, S. A.; Blin, K.; Shaw, S.; Navarro-Muñoz, J. C.; Terlouw, B. R.; van der Hooft, J. J. J.; van Santen, J. A.; Tracanna, V.; Suarez Duran, H. G.; Pascal Andreu, V.; Selem-Mojica, N.; Alanjary, M.; Robinson, S. L.; Lund, G.; Epstein, S. C.; Sisto, A. C.; Charkoudian, L. K.; Collemare, J.; Linington, R. G.; Weber, T.; Medema, M. H. MIBiG 2.0: A Repository for Biosynthetic Gene Clusters of Known Function. *Nucleic Acids Res.* **2020**, *48* (D1), D454–D458. <https://doi.org/10.1093/nar/gkz882>.
- (6) Lu, S.; Wang, J.; Chitsaz, F.; Derbyshire, M. K.; Geer, R. C.; Gonzales, N. R.; Gwadz, M.; Hurwitz, D. I.; Marchler, G. H.; Song, J. S.; Thanki, N.; Yamashita, R. A.; Yang, M.; Zhang, D.; Zheng, C.; Lanczycki, C. J.; Marchler-Bauer, A. CDD/SPARCLE: The Conserved Domain Database in 2020. *Nucleic Acids Res.* **2020**, *48* (D1), D265–D268. <https://doi.org/10.1093/nar/gkz991>.
- (7) Marchler-Bauer, A.; Anderson, J. B.; Derbyshire, M. K.; DeWeese-Scott, C.; Gonzales, N. R.; Gwadz, M.; Hao, L.; He, S.; Hurwitz, D. I.; Jackson, J. D.; Ke, Z.; Krylov, D.; Lanczycki, C. J.; Liebert, C. A.; Liu, C.; Lu, F.; Lu, S.; Marchler, G. H.; Mullokandov, M.; Song, J. S.; Thanki, N.; Yamashita, R. A.; Yin, J. J.; Zhang, D.; Bryant, S. H. CDD: A Conserved Domain Database for Interactive Domain Family Analysis. *Nucleic Acids Res.* **2007**, *35* (D1), 237–240. <https://doi.org/10.1093/nar/gkl951>.
- (8) Letunic, I.; Bork, P. Interactive Tree Of Life (ITOL) v4: Recent Updates and New Developments. *Nucleic Acids Res.* **2019**, *47* (W1), W256–W259. <https://doi.org/10.1093/nar/gkz239>.
- (9) Edgar, R. C. MUSCLE: Multiple Sequence Alignment with High Accuracy and High Throughput. *Nucleic Acids Res.* **2004**, *32* (5), 1792–1797. <https://doi.org/10.1093/nar/gkh340>.

- (10) Price, M. N.; Dehal, P. S.; Arkin, A. P. FastTree 2 - Approximately Maximum-Likelihood Trees for Large Alignments. *PLoS One* **2010**, *5* (3). <https://doi.org/10.1371/journal.pone.0009490>.
- (11) Miller, M. A.; Pfeiffer, W.; Schwartz, T. Creating the CIPRES Science Gateway for Inference of Large Phylogenetic Trees. In *2010 Gateway Computing Environments Workshop, GCE 2010*; New Orleans, LA, **2010**; pp 1–8. <https://doi.org/10.1109/GCE.2010.5676129>.
- (12) Jiang, C.; Kim, S. Y.; Suh, D. Y. Divergent Evolution of the Thiolase Superfamily and Chalcone Synthase Family. *Mol. Phylogenet. Evol.* **2008**, *49* (3), 691–701. <https://doi.org/10.1016/j.ympev.2008.09.002>.
- (13) Darriba, D.; Taboada, G. L.; Doallo, R.; Posada, D. ProtTest 3: Fast Selection of Best-Fit Models of Protein Evolution. *Bioinformatics* **2011**, *27* (8), 1164–1165. [https://doi.org/10.1007/978-3-642-21878-1\\_22](https://doi.org/10.1007/978-3-642-21878-1_22).
- (14) Stamatakis, A. RAxML Version 8: A Tool for Phylogenetic Analysis and Post-Analysis of Large Phylogenies. *Bioinformatics* **2014**, *30* (9), 1312–1313. <https://doi.org/10.1093/bioinformatics/btu033>.
- (15) Elfeki, M.; Alanjary, M.; Green, S. J.; Ziemert, N.; Murphy, B. T. Assessing the Efficiency of Cultivation Techniques to Recover Natural Product Biosynthetic Gene Populations from Sediment. *ACS Chem. Biol.* **2018**. <https://doi.org/10.1021/acscchembio.8b00254>.
- (16) Gumerov, V. M.; Zhulin, I. B. TREND: A Platform for Exploring Protein Function in Prokaryotes Based on Phylogenetic, Domain Architecture and Gene Neighborhood Analyses. *Nucleic Acids Res.* **2020**, *48* (1), W72–W76. <https://doi.org/10.1093/NAR/GKAA243>.
- (17) Millán-Aguñáaga, N.; Chavarria, K. L.; Ugalde, J. A.; Letzel, A.-C.; Rouse, G. W.; Jensen, P. R. Phylogenomic Insight into *Salinispora* (Bacteria, Actinobacteria) Species Designations. *Sci. Rep.* **2017**, *7*, 3564. <https://doi.org/10.1038/s41598-17-02845-3>.
- (18) Wawrik, B.; Kerkhof, L.; Zylstra, G. J.; Kukor, J. J. Identification of Unique Type II Polyketide Synthase Genes in Soil. *Appl. Environ. Microbiol.* **2005**, *71* (5), 2232–2238. <https://doi.org/10.1128/AEM.71.5.2232-2238.2005>.
- (19) Cai, H.; Li, Q.; Fang, X.; Li, J.; Curtis, N. E.; Altenburger, A.; Shibata, T.; Feng, M.; Maeda, T.; Schwartz, J. A.; Shigenobu, S.; Lundholm, N.; Nishiyama, T.; Yang, H.; Hasebe, M.; Li, S.; Pierce, S. K.; Wang, J. Data Descriptor: A Draft Genome Assembly of the Solar-Powered Sea Slug *Elysia Chlorotica*. *Sci. Data* **2019**, *6*, 1–13. <https://doi.org/10.1038/sdata.2019.22>.
- (20) Torres, J. P.; Lin, Z.; Winter, J. M.; Krug, P. J.; Schmidt, E. W. Animal Biosynthesis of Complex Polyketides in a Photosynthetic Partnership. *Nat. Commun.* **2020**, *11* (1), 1–12. <https://doi.org/10.1038/s41467-020-16376-5>.
- (21) Schorn, M. A.; Verhoeven, S.; Ridder, L.; Huber, F.; Acharya, D. D.; Aksenov, A. A.; Aleti, G.; Moghaddam, J. A.; Aron, A. T.; Aziz, S.; Bauermeister, A.; Bauman, K. D.; Baunach, M.; Beemelmans, C.; Beman, J. M.; Berlanga-Clavero, M. V.;

- Blacutt, A. A.; Bode, H. B.; Boullie, A.; Brejnrod, A.; Bugni, T. S.; Calteau, A.; Cao, L.; Carrión, V. J.; Castelo-Branco, R.; Chanana, S.; Chase, A. B.; Chevrette, M. G.; Costa-Lotufo, L. V.; Crawford, J. M.; Currie, C. R.; Cuypers, B.; Dang, T.; de Rond, T.; Demko, A. M.; Dittmann, E.; Du, C.; Drozd, C.; Dujardin, J. C.; Dutton, R. J.; Edlund, A.; Fewer, D. P.; Garg, N.; Gauglitz, J. M.; Gentry, E. C.; Gerwick, L.; Glukhov, E.; Gross, H.; Gugger, M.; Guillén Matus, D. G.; Helfrich, E. J. N.; Hempel, B. F.; Hur, J. S.; Iorio, M.; Jensen, P. R.; Kang, K. Bin; Kaysser, L.; Kelleher, N. L.; Kim, C. S.; Kim, K. H.; Koester, I.; König, G. M.; Leao, T.; Lee, S. R.; Lee, Y. Y.; Li, X.; Little, J. C.; Maloney, K. N.; Männle, D.; Martin H, C.; McAvoy, A. C.; Metcalf, W. W.; Mohimani, H.; Molina-Santiago, C.; Moore, B. S.; Mullaney, M. W.; Muskat, M.; Nothias, L. F.; O'Neill, E. C.; Parkinson, E. I.; Petras, D.; Piel, J.; Pierce, E. C.; Pires, K.; Reher, R.; Romero, D.; Roper, M. C.; Rust, M.; Saad, H.; Saenz, C.; Sanchez, L. M.; Sørensen, S. J.; Sosio, M.; Süßmuth, R. D.; Sweeney, D.; Tahlan, K.; Thomson, R. J.; Tobias, N. J.; Trindade-Silva, A. E.; van Wezel, G. P.; Wang, M.; Weldon, K. C.; Zhang, F.; Ziemert, N.; Duncan, K. R.; Crüsemann, M.; Rogers, S.; Dorrestein, P. C.; Medema, M. H.; van der Hoof, J. J. J. A Community Resource for Paired Genomic and Metabolomic Data Mining. *Nature Chemical Biology*. **2021**, pp 363–368. <https://doi.org/10.1038/s41589-020-00724-z>.
- (22) Owen, J. G.; Reddy, B. V. B.; Ternei, M. A.; Charlop-Powers, Z.; Calle, P. Y.; Kim, J. H.; Brady, S. F. Mapping Gene Clusters within Arrayed Metagenomic Libraries to Expand the Structural Diversity of Biomedically Relevant Natural Products. *Proc. Natl. Acad. Sci. U. S. A.* **2013**, *110* (29), 11797–11802. <https://doi.org/10.1073/pnas.1222159110>.
- (23) Borsetto, C.; Amos, G. C. A.; Nunes da Rocha, U.; Mitchell, A. L.; Finn, R. D.; Laidi, R. F.; Vallin, C.; Pearce, D. A.; Newsham, K. K.; Wellington, E. M. H. Microbial Community Drivers of PK / NRP Gene Diversity in Selected Global Soils. *Microbiome* **2019**, 1–11.
